# Supplementary material for: NOLAN: a randomized, phase 2 study to estimate the effect of prophylactic naproxen or loratadine vs no prophylactic treatment on bone pain in patients with early-stage breast cancer receiving chemotherapy and pegfilgrastim
Source: PubMed Central journal article supplement — Support Care Cancer. 2017 Nov 16;26(4):1323–34. doi: 10.1007/s00520-017-3959-2 (PMC5847062; doi:10.1007/s00520-017-3959-2), 2017-11-16

## SUPPLEMENTAL MATERIAL

### **NOLAN: A randomized, phase 2 study to estimate the effect of prophylactic naproxen or loratadine vs no prophylactic treatment on bone pain in patients with early-stage breast cancer receiving chemotherapy and pegfilgrastim**

Jeffrey J Kirshner,<sup>1</sup> Maxwell C McDonald III,<sup>2</sup> Flavio Kruter,<sup>3</sup> Andrew S Guinigundo,<sup>4</sup> Linda Vanni,<sup>5</sup> Cathy L Maxwell,<sup>6</sup> Maureen Reiner,<sup>7</sup> Terry E Upchurch,<sup>7</sup> Jacob Garcia,<sup>7\*</sup> Phuong Khanh Morrow<sup>7</sup>

<sup>1</sup>Hematology-Oncology Associates of Central New York, East Syracuse, NY

<sup>2</sup>Willis Knighton Cancer Center, Shreveport, LA

<sup>3</sup>William E Kahlert Regional Cancer Center, Westminster, MD

<sup>4</sup>Oncology Hematology Care Inc., Cincinnati, OH

<sup>5</sup>Ascension Providence, Southfield, MI

<sup>6</sup>TESARO Inc., Waltham, MA

<sup>7</sup>Amgen Inc., Thousand Oaks, CA

\*Current affiliation: Juno Therapeutics Inc., Seattle, WA

Corresponding author: Jeffrey J Kirshner, MD  
Hematology Oncology Associates of Central New York  
5008 Brittonfield Parkway  
East Syracuse, NY 13057  
Tel: 315-472-7504  
Fax: 315-479-8639  
Email: jkirshner@hoacny.com

## **Full Listing of Inclusion and Exclusion Criteria**

### *Inclusion Criteria*

- Age  $\geq 18$  years
- Eastern Cooperative Oncology Group performance status  $\leq 2$
- Female with newly diagnosed, not previously treated with chemotherapy, stage I–III breast cancer
- Medically eligible to safely receive adjuvant or neoadjuvant chemotherapy, pegfilgrastim, naproxen, and loratadine as determined by the investigator
- Creatinine  $\leq 1.5$  x upper limit of normal
- Planning to receive at least 4 cycles of adjuvant or neoadjuvant chemotherapy
- Planning to receive prophylaxis with pegfilgrastim starting in the first cycle and continuing throughout each chemotherapy cycle of the treatment period
- Patient has provided informed consent

### *Exclusion Criteria*

- History of other malignancy within the past 5 years, with the following exceptions:
  - Adequately treated non-melanoma skin cancer or lentigo maligna without evidence of disease
  - Adequately treated cervical carcinoma in situ without evidence of disease
- Planning to receive weekly chemotherapy
- Ongoing chronic pain, or other painful conditions requiring treatment (including immediate post-operative treatment of surgical or procedural-associated pain) as determined by the investigator
- Chronic oral steroid use. Premedication related to the administration of chemotherapy, and use of antiemetics is allowed, per usual clinical practice

- Chronic use of oral nonsteroidal anti-inflammatory drugs or oral antihistamines outside of those dictated by the randomization groups outlined in the protocol, with the following exception:
  - Chronic oral aspirin use for cardiovascular-related indications
- Prior chemotherapy treatment for cancer within 5 years of current breast cancer diagnosis
- Prior use of granulocyte colony-stimulating factor
- History of clinically significant gastrointestinal (GI) bleeding, history of GI ulcers, or active GI bleeding within 6 months prior to randomization
- History of clinically significant bleeding disorders, thromboembolism within 6 months prior to randomization
- Currently enrolled in, or less than 30 days since ending, another clinical trial which includes language directing G-CSF (filgrastim, pegfilgrastim, other) or GM-CSF (sargramostim) use
- Currently enrolled in, or less than 30 days since ending, another interventional clinical trial that includes a blinded treatment or blinded treatment arm (whether or not the patient is randomized to the blinded arm)
  - Currently enrolled in, or less than 30 days since ending, another interventional clinical trial that includes the use of any agent not currently considered to be standard therapy for the adjuvant or neoadjuvant treatment of stage I–III breast cancer based on National Comprehensive Cancer Network Clinical Practice Guidelines in Oncology for Breast Cancer
- Currently enrolled in, or less than 30 days since ending, any pain intervention study
- Female patients who are pregnant or lactating or of reproductive potential not willing to employ an effective method of birth control during treatment and for 17 days after discontinuing study treatment

- History or evidence of any other clinically significant disorder, condition, or disease (with the exception of those outlined above) that, in the opinion of the Investigator or Amgen, if consulted, would pose a risk to patient safety or interfere with the study evaluation, procedures or completion

**Supplemental Table 1** Summary of chemotherapy regimens (full analysis set<sup>a</sup>)

| Chemotherapy regimen                                                                             | No prophylaxis<br>(N = 191)<br>n (%) | Naproxen<br>500 mg BID<br>(N = 196)<br>n (%) | Loratadine<br>10 mg QD<br>(N = 200)<br>n (%) | Total<br>(N = 587)<br>n (%) |
|--------------------------------------------------------------------------------------------------|--------------------------------------|----------------------------------------------|----------------------------------------------|-----------------------------|
| AC (doxorubicin, cyclophosphamide) Q3W                                                           | 17 (8.9)                             | 11 (5.6)                                     | 13 (6.5)                                     | 41 (7.0)                    |
| AC (doxorubicin, cyclophosphamide) Q4W                                                           | 1 (0.5)                              | 1 (0.5)                                      | 0 (0.0)                                      | 2 (0.3)                     |
| Dose-dense AC (doxorubicin, cyclophosphamide) Q2W                                                | 87 (45.5)                            | 80 (40.8)                                    | 87 (43.5)                                    | 254 (43.3)                  |
| Dose-dense TC (docetaxel, cyclophosphamide) Q2W                                                  | 3 (1.6)                              | 0 (0.0)                                      | 1 (0.5)                                      | 4 (0.7)                     |
| EC (epirubicin, cyclophosphamide) Q2W                                                            | 0 (0.0)                              | 1 (0.5)                                      | 3 (1.5)                                      | 4 (0.7)                     |
| EC (epirubicin, cyclophosphamide) Q3W                                                            | 3 (1.6)                              | 3 (1.5)                                      | 3 (1.5)                                      | 9 (1.5)                     |
| FAC (5-fluorouracil, doxorubicin, cyclophosphamide) +/- sequential docetaxel +/- trastuzumab Q2W | 0 (0.0)                              | 1 (0.5)                                      | 0 (0.0)                                      | 1 (0.2)                     |
| FAC (5-fluorouracil, doxorubicin, cyclophosphamide) +/- sequential docetaxel +/- trastuzumab Q3W | 1 (0.5)                              | 5 (2.6)                                      | 4 (2.0)                                      | 10 (1.7)                    |
| FEC (5-fluorouracil, epirubicin, cyclophosphamide) +/- sequential paclitaxel +/- trastuzumab Q3W | 1 (0.5)                              | 0 (0.0)                                      | 1 (0.5)                                      | 2 (0.3)                     |
| Other missing frequency                                                                          | 1 (0.5)                              | 0 (0.0)                                      | 0 (0.0)                                      | 1 (0.2)                     |
| Other Q2W                                                                                        | 0 (0.0)                              | 1 (0.5)                                      | 0 (0.0)                                      | 1 (0.2)                     |
| Other Q3W                                                                                        | 6 (3.1)                              | 8 (4.1)                                      | 0 (0.0)                                      | 14 (2.4)                    |
| TAC (docetaxel, doxorubicin, cyclophosphamide) Q3W                                               | 18 (9.4)                             | 10 (5.1)                                     | 8 (4.0)                                      | 36 (6.1)                    |
| TC (docetaxel, cyclophosphamide) Q3W                                                             | 39 (20.4)                            | 46 (23.5)                                    | 52 (26.0)                                    | 137 (23.3)                  |
| TCH (docetaxel, carboplatin, trastuzumab) +/- pertuzumab Q2W                                     | 0 (0.0)                              | 1 (0.5)                                      | 0 (0.0)                                      | 1 (0.2)                     |
| TCH (docetaxel, carboplatin, trastuzumab) +/- pertuzumab Q3W                                     | 25 (13.1)                            | 35 (17.9)                                    | 35 (17.5)                                    | 95 (16.2)                   |
| TCH (docetaxel, carboplatin, trastuzumab) +/- pertuzumab Q4W                                     | 0 (0.0)                              | 0 (0.0)                                      | 1 (0.5)                                      | 1 (0.2)                     |

*N* number of patients in the treatment group or total, *n* number of patients who received the specified regimen; Q2W once every 2 weeks; Q3W once every 3 weeks; Q4W once every 4 weeks. Percentages are calculated as  $n/N \times 100$

<sup>a</sup> The full analysis set includes all patients who received primary prophylaxis with pegfilgrastim

**Supplemental Table 2** Patients with severe (grade 3 or 4) bone pain from AE reporting (full analysis set<sup>a</sup>)

| Grade 3 or 4 bone pain <sup>b</sup>       | No prophylaxis<br>(N = 191) | Naproxen<br>500 mg BID<br>(N = 196) | Loratadine<br>10 mg QD<br>(N = 200) | Difference<br>(naproxen<br>minus no<br>prophylaxis) | Difference<br>(loratadine<br>minus no<br>prophylaxis) | Difference<br>(loratadine<br>minus<br>naproxen) |
|-------------------------------------------|-----------------------------|-------------------------------------|-------------------------------------|-----------------------------------------------------|-------------------------------------------------------|-------------------------------------------------|
| Cycle 1 – n (%) <sup>c</sup>              | 191 (100.0)                 | 196 (100.0)                         | 200 (100.0)                         |                                                     |                                                       |                                                 |
| Patients who reported<br>bone pain        | 9                           | 6                                   | 9                                   |                                                     |                                                       |                                                 |
| Percentage                                | 4.7                         | 3.1                                 | 4.5                                 | -1.7                                                | -0.2                                                  | 1.4                                             |
| 95% CI for<br>percentage <sup>d</sup>     | (2.2, 8.8)                  | (1.1, 6.5)                          | (2.1, 8.4)                          | (-6.0, 2.7)                                         | (-4.9, 4.5)                                           | (-2.8, 5.7)                                     |
| Cycle 2 – n (%) <sup>c</sup>              | 178 (93.2)                  | 180 (91.8)                          | 193 (96.5)                          |                                                     |                                                       |                                                 |
| Patients who reported<br>bone pain        | 2                           | 3                                   | 0                                   |                                                     |                                                       |                                                 |
| Percentage                                | 1.1                         | 1.7                                 | 0.0                                 | 0.5                                                 | -1.1                                                  | -1.7                                            |
| 95% CI for<br>percentage <sup>d</sup>     | (0.1, 4.0)                  | (0.3, 4.8)                          | (0.0, 1.9)                          | (-2.4, 3.5)                                         | (-3.2, 1.0)                                           | (-4.1, 0.7)                                     |
| Cycle 3 – n (%) <sup>c</sup>              | 165 (86.4)                  | 176 (89.8)                          | 188 (94.0)                          |                                                     |                                                       |                                                 |
| Patients who reported<br>bone pain        | 3                           | 2                                   | 0                                   |                                                     |                                                       |                                                 |
| Percentage                                | 1.8                         | 1.1                                 | 0.0                                 | -0.7                                                | -1.8                                                  | -1.1                                            |
| 95% CI for<br>percentage <sup>d</sup>     | (0.4, 5.2)                  | (0.1, 4.0)                          | (0.0, 1.9)                          | (-3.8, 2.5)                                         | (-4.4, 0.8)                                           | (-3.3, 1.0)                                     |
| Cycle 4 – n (%) <sup>c</sup>              | 162 (84.8)                  | 169 (86.2)                          | 179 (89.5)                          |                                                     |                                                       |                                                 |
| Patients who reported<br>bone pain        | 3                           | 1                                   | 0                                   |                                                     |                                                       |                                                 |
| Percentage                                | 1.9                         | 0.6                                 | 0.0                                 | -1.3                                                | -1.9                                                  | -0.6                                            |
| 95% CI for<br>percentage <sup>d</sup>     | (0.4, 5.3)                  | (0.0, 3.3)                          | (0.0, 2.0)                          | (-4.2, 1.7)                                         | (-4.5, 0.8)                                           | (-2.3, 1.1)                                     |
| Across all cycles – n<br>(%) <sup>c</sup> | 191 (100.0)                 | 196 (100.0)                         | 200 (100.0)                         |                                                     |                                                       |                                                 |
| Patients who reported<br>bone pain        | 11                          | 8                                   | 9                                   |                                                     |                                                       |                                                 |

|                                    |             |            |            |             |             |             |
|------------------------------------|-------------|------------|------------|-------------|-------------|-------------|
| Percentage                         | 5.8         | 4.1        | 4.5        | -1.7        | -1.3        | 0.4         |
| 95% CI for percentage <sup>d</sup> | (2.9, 10.1) | (1.8, 7.9) | (2.1, 8.4) | (-6.5, 3.2) | (-6.1, 3.6) | (-4.1, 4.9) |

*AE* adverse event, *BID* twice a day, *CI* confidence interval, *N* number of patients in the analysis set, *QD* once a day

<sup>a</sup> The full analysis set includes all patients who received primary prophylaxis with pegfilgrastim

<sup>b</sup> This analysis was prespecified, but there were no reports of grade 4 bone pain.

<sup>c</sup> For individual cycles, *n* and percentage are based on the number of patients who entered the cycle. For across all cycles, *n* and percentage are based on the number of patients who started chemotherapy

<sup>d</sup> CIs for percentages are calculated using the binomial distribution. CIs for the difference between percentages are calculated using Fleiss's method with continuity correction

**Supplemental Table 3** Patient-reported maximum bone pain (scale 0–10) by cycle and across all cycles: age <65 years (full analysis set<sup>a</sup>)

| Maximum patient-reported bone pain <sup>b</sup> | No prophylaxis<br>(N = 156) | Naproxen<br>500 mg BID<br>(N = 158) | Loratadine<br>10 mg QD<br>(N = 162) | Difference<br>(naproxen<br>minus no<br>prophylaxis) | Difference<br>(loratadine<br>minus no<br>prophylaxis) | Difference<br>(loratadine<br>minus<br>naproxen) |
|-------------------------------------------------|-----------------------------|-------------------------------------|-------------------------------------|-----------------------------------------------------|-------------------------------------------------------|-------------------------------------------------|
| <b>Cycle 1</b>                                  |                             |                                     |                                     |                                                     |                                                       |                                                 |
| n <sup>c</sup>                                  | 156                         | 158                                 | 162                                 |                                                     |                                                       |                                                 |
| Mean (SE)                                       | 4.1 (0.3)                   | 3.2 (0.3)                           | 3.0 (0.2)                           | -0.9 (0.4)                                          | -1.1 (0.3)                                            | -0.2 (0.3)                                      |
| 95% CI <sup>d</sup>                             | (3.6, 4.6)                  | (2.7, 3.7)                          | (2.6, 3.5)                          | (-1.6, -0.2)                                        | (-1.8, -0.4)                                          | (-0.9, 0.5)                                     |
| <i>P</i> value <sup>d</sup>                     |                             |                                     |                                     | <b>0.015</b>                                        | <b>0.002</b>                                          | 0.545                                           |
| <b>Cycle 2</b>                                  |                             |                                     |                                     |                                                     |                                                       |                                                 |
| n <sup>c</sup>                                  | 147                         | 148                                 | 158                                 |                                                     |                                                       |                                                 |
| Mean (SE)                                       | 3.2 (0.3)                   | 2.6 (0.2)                           | 2.6 (0.2)                           | -0.6 (0.3)                                          | -0.7 (0.3)                                            | -0.0 (0.3)                                      |
| 95% CI <sup>d</sup>                             | (2.7, 3.7)                  | (2.1, 3.1)                          | (2.2, 3.0)                          | (-1.3, 0.0)                                         | (-1.3, 0.0)                                           | (-0.7, 0.6)                                     |
| <i>P</i> value <sup>d</sup>                     |                             |                                     |                                     | 0.069                                               | 0.050                                                 | 0.932                                           |
| <b>Cycle 3</b>                                  |                             |                                     |                                     |                                                     |                                                       |                                                 |
| n <sup>c</sup>                                  | 136                         | 144                                 | 153                                 |                                                     |                                                       |                                                 |
| Mean (SE)                                       | 3.0 (0.3)                   | 2.4 (0.2)                           | 2.6 (0.2)                           | -0.5 (0.4)                                          | -0.3 (0.3)                                            | 0.2 (0.3)                                       |
| 95% CI <sup>d</sup>                             | (2.4, 3.5)                  | (1.9, 2.9)                          | (2.2, 3.1)                          | (-1.2, 0.1)                                         | (-1.0, 0.4)                                           | (-0.4, 0.9)                                     |
| <i>P</i> value <sup>d</sup>                     |                             |                                     |                                     | 0.118                                               | 0.369                                                 | 0.465                                           |
| <b>Cycle 4</b>                                  |                             |                                     |                                     |                                                     |                                                       |                                                 |
| n <sup>c</sup>                                  | 133                         | 140                                 | 149                                 |                                                     |                                                       |                                                 |
| Mean (SE)                                       | 3.0 (0.3)                   | 2.3 (0.2)                           | 2.3 (0.2)                           | -0.8 (0.4)                                          | -0.8 (0.3)                                            | -0.0 (0.3)                                      |
| 95% CI <sup>d</sup>                             | (2.5, 3.6)                  | (1.8, 2.8)                          | (1.8, 2.7)                          | (-1.5, -0.1)                                        | (-1.4, -0.1)                                          | (-0.7, 0.6)                                     |
| <i>P</i> value <sup>d</sup>                     |                             |                                     |                                     | <b>0.032</b>                                        | <b>0.020</b>                                          | 0.946                                           |
| <b>Across all cycles</b>                        |                             |                                     |                                     |                                                     |                                                       |                                                 |
| n <sup>c</sup>                                  | 156                         | 158                                 | 162                                 |                                                     |                                                       |                                                 |
| Mean (SE)                                       | 5.0 (0.3)                   | 4.3 (0.3)                           | 4.2 (0.2)                           | -0.7 (0.4)                                          | -0.9 (0.4)                                            | -0.2 (0.4)                                      |
| 95% CI <sup>d</sup>                             | (4.5, 5.5)                  | (3.8, 4.8)                          | (3.7, 4.7)                          | (-1.4, 0.0)                                         | (-1.6, -0.2)                                          | (-0.9, 0.5)                                     |
| <i>P</i> value <sup>d</sup>                     |                             |                                     |                                     | 0.057                                               | <b>0.015</b>                                          | 0.626                                           |

Note: All missing values of patient-reported bone pain within any cycle were imputed. *P* values <0.05 are shown in bold



*BID* twice a day, *CI* confidence interval, *N* number of patients in the analysis set, *QD* once a day, *SE* standard error

<sup>a</sup> The full analysis set includes all patients who received primary prophylaxis with pegfilgrastim

<sup>b</sup> Maximum patient-reported bone pain is the maximum value of each patient's bone pain values across survey days 1–5 within each cycle. Across all cycles, the maximum is the maximum value of each patient's reported bone pain values across all survey days 1–5 across all cycles

<sup>c</sup> For individual cycles, *n* is based on the number of patients who entered the cycle. For across all cycles, *n* is based on the number of patients who started chemotherapy

<sup>d</sup> The 95% *CI* and *P* value are calculated using an analysis of variance (ANOVA) model, with differences calculated using pairwise least-squares mean differences

**Supplemental Table 4** Patient-reported maximum bone pain (scale 0–10) by cycle and across all cycles: age ≥65 years (full analysis set<sup>a</sup>)

| Maximum patient-reported bone pain <sup>b</sup> | No prophylaxis<br>(N = 35) | Naproxen<br>500 mg BID<br>(N = 38) | Loratadine<br>10 mg QD<br>(N = 38) | Difference<br>(naproxen<br>minus no<br>prophylaxis) | Difference<br>(loratadine<br>minus no<br>prophylaxis) | Difference<br>(loratadine<br>minus<br>naproxen) |
|-------------------------------------------------|----------------------------|------------------------------------|------------------------------------|-----------------------------------------------------|-------------------------------------------------------|-------------------------------------------------|
| <b>Cycle 1</b>                                  |                            |                                    |                                    |                                                     |                                                       |                                                 |
| n <sup>c</sup>                                  | 35                         | 38                                 | 38                                 |                                                     |                                                       |                                                 |
| Mean (SE)                                       | 2.9 (0.5)                  | 3.4 (0.5)                          | 3.0 (0.5)                          | 0.6 (0.8)                                           | 0.1 (0.7)                                             | -0.4 (0.8)                                      |
| 95% CI <sup>d</sup>                             | (1.9, 3.9)                 | (2.4, 4.5)                         | (NA, NA)                           | (-0.9, 2.0)                                         | (-1.3, 1.6)                                           | (-1.9, 1.1)                                     |
| P value <sup>d</sup>                            |                            |                                    |                                    | 0.463                                               | 0.846                                                 | 0.586                                           |
| <b>Cycle 2</b>                                  |                            |                                    |                                    |                                                     |                                                       |                                                 |
| n <sup>c</sup>                                  | 31                         | 32                                 | 35                                 |                                                     |                                                       |                                                 |
| Mean (SE)                                       | 1.8 (0.5)                  | 1.6 (0.5)                          | 2.4 (0.5)                          | -0.2 (0.7)                                          | 0.6 (0.7)                                             | 0.8 (0.7)                                       |
| 95% CI <sup>d</sup>                             | (0.9, 2.8)                 | (0.7, 2.5)                         | (1.4, 3.5)                         | (-1.5, 1.1)                                         | (-0.8, 2.0)                                           | (-0.5, 2.2)                                     |
| P value <sup>d</sup>                            |                            |                                    |                                    | 0.711                                               | 0.421                                                 | 0.238                                           |
| <b>Cycle 3</b>                                  |                            |                                    |                                    |                                                     |                                                       |                                                 |
| n <sup>c</sup>                                  | 29                         | 32                                 | 35                                 |                                                     |                                                       |                                                 |
| Mean (SE)                                       | 1.7 (0.5)                  | 1.3 (0.4)                          | 2.0 (0.5)                          | -0.4 (0.6)                                          | 0.3 (0.7)                                             | 0.7 (0.6)                                       |
| 95% CI <sup>d</sup>                             | (0.8, 2.6)                 | (0.5, 2.1)                         | (1.1, 2.9)                         | (-1.6, 0.8)                                         | (-1.0, 1.6)                                           | (-0.5, 1.9)                                     |
| P value <sup>d</sup>                            |                            |                                    |                                    | 0.534                                               | 0.677                                                 | 0.286                                           |
| <b>Cycle 4</b>                                  |                            |                                    |                                    |                                                     |                                                       |                                                 |
| n <sup>c</sup>                                  | 29                         | 29                                 | 30                                 |                                                     |                                                       |                                                 |
| Mean (SE)                                       | 1.7 (0.4)                  | 1.3 (0.5)                          | 1.6 (0.5)                          | -0.4 (0.6)                                          | -0.1 (0.6)                                            | 0.3 (0.7)                                       |
| 95% CI <sup>d</sup>                             | (0.8, 2.5)                 | (0.4, 2.2)                         | (NA, NA)                           | (-1.7, 0.9)                                         | (-1.3, 1.2)                                           | (-1.0, 1.6)                                     |
| P value <sup>d</sup>                            |                            |                                    |                                    | 0.547                                               | 0.925                                                 | 0.613                                           |
| <b>Across all cycles</b>                        |                            |                                    |                                    |                                                     |                                                       |                                                 |
| n <sup>c</sup>                                  | 35                         | 38                                 | 38                                 |                                                     |                                                       |                                                 |
| Mean (SE)                                       | 3.3 (0.5)                  | 3.8 (0.6)                          | 3.5 (0.5)                          | 0.5 (0.8)                                           | 0.2 (0.8)                                             | -0.2 (0.8)                                      |
| 95% CI <sup>d</sup>                             | (2.2, 4.3)                 | (2.7, 4.9)                         | (2.5, 4.6)                         | (-1.0, 2.0)                                         | (-1.3, 1.7)                                           | (-1.8, 1.3)                                     |
| P value <sup>d</sup>                            |                            |                                    |                                    | 0.531                                               | 0.755                                                 | 0.753                                           |

Note: All missing values of patient-reported bone pain within any cycle were imputed

*BID* twice a day, *CI* confidence interval, *N* number of patients in the analysis set, *NA* not available, *QD* once a day, *SE* standard error

<sup>a</sup> The full analysis set includes all patients who received primary prophylaxis with pegfilgrastim

<sup>b</sup> Maximum patient-reported bone pain is the maximum value of each patient's bone pain values across survey days 1–5 within each cycle. Across all cycles, the maximum is the maximum value of each patient's reported bone pain values across all survey days 1–5 across all cycles

<sup>c</sup> For individual cycles, *n* is based on the number of patients who entered the cycle. For across all cycles, *n* is based on the number of patients who started chemotherapy

<sup>d</sup> The 95% *CI* and *P* value are calculated using an ANOVA model, with differences calculated using pairwise least-squares mean differences

**Supplemental Table 5** Patient-reported maximum bone pain (scale 0–10) by cycle and across all cycles: taxane-based chemotherapy (full analysis set<sup>a</sup>)

| Maximum patient-reported bone pain <sup>b</sup> | No prophylaxis (N = 107) | Naproxen 500 mg BID (N = 111) | Loratadine 10 mg QD (N = 113) | Difference (naproxen minus no prophylaxis) | Difference (loratadine minus no prophylaxis) | Difference (loratadine minus naproxen) |
|-------------------------------------------------|--------------------------|-------------------------------|-------------------------------|--------------------------------------------|----------------------------------------------|----------------------------------------|
| <b>Cycle 1</b>                                  |                          |                               |                               |                                            |                                              |                                        |
| n <sup>c</sup>                                  | 107                      | 111                           | 113                           |                                            |                                              |                                        |
| Mean (SE)                                       | 4.7 (0.3)                | 4.0 (0.3)                     | 3.8 (0.3)                     | -0.6 (0.4)                                 | -0.9 (0.4)                                   | -0.3 (0.4)                             |
| 95% CI <sup>d</sup>                             | (4.0, 5.3)               | (3.5, 4.6)                    | (3.2, 4.3)                    | (-1.5, 0.2)                                | (-1.7, -0.0)                                 | (-1.1, 0.5)                            |
| P value <sup>d</sup>                            |                          |                               |                               | 0.161                                      | <b>0.040</b>                                 | 0.498                                  |
| <b>Cycle 2</b>                                  |                          |                               |                               |                                            |                                              |                                        |
| n <sup>c</sup>                                  | 97                       | 98                            | 109                           |                                            |                                              |                                        |
| Mean (SE)                                       | 3.4 (0.3)                | 2.8 (0.3)                     | 3.3 (0.3)                     | -0.6 (0.4)                                 | -0.1 (0.4)                                   | 0.5 (0.4)                              |
| 95% CI <sup>d</sup>                             | (2.7, 4.0)               | (2.2, 3.3)                    | (2.7, 3.8)                    | (-1.5, 0.3)                                | (-1.0, 0.8)                                  | (-0.3, 1.3)                            |
| P value <sup>d</sup>                            |                          |                               |                               | 0.171                                      | 0.816                                        | 0.214                                  |
| <b>Cycle 3</b>                                  |                          |                               |                               |                                            |                                              |                                        |
| n <sup>c</sup>                                  | 86                       | 97                            | 105                           |                                            |                                              |                                        |
| Mean (SE)                                       | 3.0 (0.3)                | 2.5 (0.3)                     | 3.1 (0.3)                     | -0.5 (0.4)                                 | 0.1 (0.4)                                    | 0.6 (0.4)                              |
| 95% CI <sup>d</sup>                             | (2.4, 3.7)               | (2.0, 3.1)                    | (2.5, 3.6)                    | (-1.4, 0.4)                                | (-0.8, 0.9)                                  | (-0.2, 1.4)                            |
| P value <sup>d</sup>                            |                          |                               |                               | 0.267                                      | 0.874                                        | 0.169                                  |
| <b>Cycle 4</b>                                  |                          |                               |                               |                                            |                                              |                                        |
| n <sup>c</sup>                                  | 84                       | 91                            | 97                            |                                            |                                              |                                        |
| Mean (SE)                                       | 3.0 (0.3)                | 2.2 (0.3)                     | 2.6 (0.3)                     | -0.8 (0.5)                                 | -0.4 (0.4)                                   | 0.5 (0.4)                              |
| 95% CI <sup>d</sup>                             | (2.4, 3.6)               | (1.6, 2.8)                    | (2.1, 3.2)                    | (-1.7, 0.1)                                | (-1.2, 0.4)                                  | (-0.4, 1.3)                            |
| P value <sup>d</sup>                            |                          |                               |                               | 0.070                                      | 0.375                                        | 0.277                                  |
| <b>Across all cycles</b>                        |                          |                               |                               |                                            |                                              |                                        |
| n <sup>c</sup>                                  | 107                      | 111                           | 113                           |                                            |                                              |                                        |
| Mean (SE)                                       | 5.3 (0.3)                | 4.7 (0.3)                     | 4.9 (0.3)                     | -0.6 (0.4)                                 | -0.4 (0.4)                                   | 0.2 (0.4)                              |
| 95% CI <sup>d</sup>                             | (4.7, 5.9)               | (4.1, 5.3)                    | (4.3, 5.4)                    | (-1.5, 0.2)                                | (-1.2, 0.4)                                  | (-0.6, 1.0)                            |
| P value <sup>d</sup>                            |                          |                               |                               | 0.149                                      | 0.329                                        | 0.610                                  |

Note: All missing values of patient-reported bone pain within any cycle were imputed. P values <0.05 are shown in bold

*BID* twice a day, *CI* confidence interval, *N* number of patients in the analysis set, *QD* once a day, *SE* standard error

<sup>a</sup> The full analysis set includes all patients who received primary prophylaxis with pegfilgrastim

<sup>b</sup> Maximum patient-reported bone pain is the maximum value of each patient's bone pain values across survey days 1–5 within each cycle. Across all cycles, the maximum is the maximum value of each patient's reported bone pain values across all survey days 1–5 across all cycles

<sup>c</sup> For individual cycles, *n* is based on the number of patients who entered the cycle. For across all cycles, *n* is based on the number of patients who started chemotherapy

<sup>d</sup> The 95% *CI* and *P* value are calculated using an analysis of variance (ANOVA) model, with differences calculated using pairwise least-squares mean differences

**Supplemental Table 6** Patient-reported maximum bone pain (scale 0–10) by cycle and across all cycles: non-taxane-based chemotherapy (full analysis set<sup>a</sup>)

| Maximum patient-reported bone pain <sup>b</sup> | No prophylaxis<br>(N = 84) | Naproxen<br>500 mg BID<br>(N = 85) | Loratadine<br>10 mg QD<br>(N = 87) | Difference<br>(naproxen<br>minus no<br>prophylaxis) | Difference<br>(loratadine<br>minus no<br>prophylaxis) | Difference<br>(loratadine<br>minus<br>naproxen) |
|-------------------------------------------------|----------------------------|------------------------------------|------------------------------------|-----------------------------------------------------|-------------------------------------------------------|-------------------------------------------------|
| Cycle 1                                         |                            |                                    |                                    |                                                     |                                                       |                                                 |
| n <sup>c</sup>                                  | 84                         | 85                                 | 87                                 |                                                     |                                                       |                                                 |
| Mean (SE)                                       | 2.9 (0.3)                  | 2.3 (0.3)                          | 2.1 (0.3)                          | −0.7 (0.5)                                          | −0.9 (0.4)                                            | −0.2 (0.4)                                      |
| 95% CI <sup>d</sup>                             | (2.3, 3.6)                 | (1.6, 2.9)                         | (1.5, 2.6)                         | (−1.6, 0.2)                                         | (−1.7, −0.0)                                          | (−1.0, 0.6)                                     |
| P value <sup>d</sup>                            |                            |                                    |                                    | 0.148                                               | <b>0.039</b>                                          | 0.642                                           |
| Cycle 2                                         |                            |                                    |                                    |                                                     |                                                       |                                                 |
| n <sup>c</sup>                                  | 81                         | 82                                 | 84                                 |                                                     |                                                       |                                                 |
| Mean (SE)                                       | 2.6 (0.3)                  | 2.0 (0.3)                          | 1.6 (0.3)                          | −0.5 (0.4)                                          | −0.9 (0.4)                                            | −0.4 (0.4)                                      |
| 95% CI <sup>d</sup>                             | (2.0, 3.1)                 | (1.5, 2.6)                         | (1.1, 2.1)                         | (−1.3, 0.3)                                         | (−1.7, −0.2)                                          | (−1.2, 0.4)                                     |
| P value <sup>d</sup>                            |                            |                                    |                                    | 0.222                                               | <b>0.019</b>                                          | 0.301                                           |
| Cycle 3                                         |                            |                                    |                                    |                                                     |                                                       |                                                 |
| n <sup>c</sup>                                  | 79                         | 79                                 | 83                                 |                                                     |                                                       |                                                 |
| Mean (SE)                                       | 2.4 (0.3)                  | 1.8 (0.3)                          | 1.8 (0.3)                          | −0.6 (0.4)                                          | −0.6 (0.4)                                            | −0.0 (0.4)                                      |
| 95% CI <sup>d</sup>                             | (1.8, 3.1)                 | (1.2, 2.4)                         | (1.3, 2.4)                         | (−1.5, 0.3)                                         | (−1.5, 0.2)                                           | (−0.8, 0.8)                                     |
| P value <sup>d</sup>                            |                            |                                    |                                    | 0.165                                               | 0.147                                                 | 0.981                                           |
| Cycle 4                                         |                            |                                    |                                    |                                                     |                                                       |                                                 |
| n <sup>c</sup>                                  | 78                         | 78                                 | 82                                 |                                                     |                                                       |                                                 |
| Mean (SE)                                       | 2.6 (0.3)                  | 2.0 (0.3)                          | 1.6 (0.3)                          | −0.6 (0.5)                                          | −1.0 (0.4)                                            | −0.4 (0.4)                                      |
| 95% CI <sup>d</sup>                             | (1.9, 3.2)                 | (1.4, 2.6)                         | (1.0, 2.1)                         | (−1.4, 0.3)                                         | (−1.9, −0.1)                                          | (−1.2, 0.3)                                     |
| P value <sup>d</sup>                            |                            |                                    |                                    | 0.219                                               | <b>0.021</b>                                          | 0.268                                           |
| Across all cycles                               |                            |                                    |                                    |                                                     |                                                       |                                                 |
| n <sup>c</sup>                                  | 84                         | 85                                 | 87                                 |                                                     |                                                       |                                                 |
| Mean (SE)                                       | 4.0 (0.4)                  | 3.7 (0.4)                          | 3.0 (0.3)                          | −0.3 (0.5)                                          | −1.0 (0.5)                                            | −0.7 (0.5)                                      |
| 95% CI <sup>d</sup>                             | (3.3, 4.7)                 | (3.0, 4.4)                         | (2.4, 3.6)                         | (−1.3, 0.7)                                         | (−1.9, −0.1)                                          | (−1.6, 0.2)                                     |
| P value <sup>d</sup>                            |                            |                                    |                                    | 0.535                                               | <b>0.035</b>                                          | 0.144                                           |

Note: All missing values of patient-reported bone pain within any cycle were imputed. P values <0.05 are shown in bold

*BID* twice a day, *CI* confidence interval, *N* number of patients in the analysis set, *QD* once a day, *SE* standard error

<sup>a</sup> The full analysis set includes all patients who received primary prophylaxis with pegfilgrastim

<sup>b</sup> Maximum patient-reported bone pain is the maximum value of each patient's bone pain values across survey days 1–5 within each cycle. Across all cycles, the maximum is the maximum value of each patient's reported bone pain values across all survey days 1–5 across all cycles

<sup>c</sup> For individual cycles, *n* is based on the number of patients who entered the cycle. For across all cycles, *n* is based on the number of patients who started chemotherapy

<sup>d</sup> The 95% *CI* and *P* value are calculated using an analysis of variance (ANOVA) model, with differences calculated using pairwise least-squares mean differences

**Supplemental Table 7** Patient-reported mean bone pain (scale 0–10) by cycle and across all cycles (full analysis set<sup>a</sup>)

| Mean patient-reported bone pain <sup>b</sup> | No prophylaxis (N = 191) | Naproxen 500 mg BID (N = 196) | Loratadine 10 mg QD (N = 200) | Difference (naproxen minus no prophylaxis) | Difference (loratadine minus no prophylaxis) | Difference (loratadine minus naproxen) |
|----------------------------------------------|--------------------------|-------------------------------|-------------------------------|--------------------------------------------|----------------------------------------------|----------------------------------------|
| <b>Cycle 1</b>                               |                          |                               |                               |                                            |                                              |                                        |
| n <sup>c</sup>                               | 191                      | 196                           | 200                           |                                            |                                              |                                        |
| Mean (SE)                                    | 2.2 (0.2)                | 1.8 (0.2)                     | 1.7 (0.1)                     | −0.3 (0.2)                                 | −0.5 (0.2)                                   | −0.2 (0.2)                             |
| 95% CI <sup>d</sup>                          | (1.9, 2.5)               | (1.5, 2.1)                    | (1.4, 1.9)                    | (−0.8, 0.1)                                | (−0.9, −0.1)                                 | (−0.6, 0.2)                            |
| P value <sup>d</sup>                         |                          |                               |                               | 0.117                                      | <b>0.016</b>                                 | 0.414                                  |
| <b>Cycle 2</b>                               |                          |                               |                               |                                            |                                              |                                        |
| n <sup>c</sup>                               | 178                      | 180                           | 193                           |                                            |                                              |                                        |
| Mean (SE)                                    | 1.7 (0.2)                | 1.3 (0.1)                     | 1.4 (0.1)                     | −0.4 (0.2)                                 | −0.3 (0.2)                                   | 0.1 (0.2)                              |
| 95% CI <sup>d</sup>                          | (1.4, 2.0)               | (1.0, 1.6)                    | (1.1, 1.6)                    | (−0.8, 0.0)                                | (−0.7, 0.1)                                  | (−0.3, 0.4)                            |
| P value <sup>d</sup>                         |                          |                               |                               | 0.080                                      | 0.135                                        | 0.741                                  |
| <b>Cycle 3</b>                               |                          |                               |                               |                                            |                                              |                                        |
| n <sup>c</sup>                               | 165                      | 176                           | 188                           |                                            |                                              |                                        |
| Mean (SE)                                    | 1.6 (0.2)                | 1.3 (0.1)                     | 1.4 (0.1)                     | −0.3 (0.2)                                 | −0.2 (0.2)                                   | 0.1 (0.2)                              |
| 95% CI <sup>d</sup>                          | (1.3, 1.9)               | (1.0, 1.6)                    | (1.1, 1.7)                    | (−0.7, 0.1)                                | (−0.6, 0.2)                                  | (−0.3, 0.5)                            |
| P value <sup>d</sup>                         |                          |                               |                               | 0.161                                      | 0.422                                        | 0.513                                  |
| <b>Cycle 4</b>                               |                          |                               |                               |                                            |                                              |                                        |
| n <sup>c</sup>                               | 162                      | 169                           | 179                           |                                            |                                              |                                        |
| Mean (SE)                                    | 1.7 (0.2)                | 1.2 (0.1)                     | 1.3 (0.1)                     | −0.5 (0.2)                                 | −0.4 (0.2)                                   | 0.1 (0.2)                              |
| 95% CI <sup>d</sup>                          | (1.4, 2.0)               | (0.9, 1.5)                    | (1.1, 1.6)                    | (−0.9, −0.1)                               | (−0.8, 0.1)                                  | (−0.3, 0.5)                            |
| P value <sup>d</sup>                         |                          |                               |                               | <b>0.029</b>                               | 0.098                                        | 0.536                                  |
| <b>Across all cycles</b>                     |                          |                               |                               |                                            |                                              |                                        |
| n <sup>c</sup>                               | 191                      | 196                           | 200                           |                                            |                                              |                                        |
| Mean (SE)                                    | 1.9 (0.1)                | 1.5 (0.1)                     | 1.5 (0.1)                     | −0.3 (0.2)                                 | −0.4 (0.2)                                   | −0.0 (0.2)                             |
| 95% CI <sup>d</sup>                          | (1.6, 2.1)               | (1.3, 1.8)                    | (1.3, 1.7)                    | (−0.7, 0.0)                                | (−0.7, −0.0)                                 | (−0.4, 0.3)                            |
| P value <sup>d</sup>                         |                          |                               |                               | 0.088                                      | <b>0.044</b>                                 | 0.801                                  |

Note: All missing values of patient-reported bone pain within any cycle were imputed. P values <0.05 are shown in bold  
*BID* twice a day, *CI* confidence interval, *N* number of patients in the analysis set, *QD* once a day, *SE* standard error

<sup>a</sup> The full analysis set includes all patients who received primary prophylaxis with pegfilgrastim



<sup>b</sup> Mean of patient-reported bone pain values is the average of each patient's bone pain values across survey days 1–5 within each cycle. Across all cycles, the mean is the average of each patient-reported bone pain value across all survey days 1–5 across all cycles

<sup>c</sup> For individual cycles, n is based on the number of patients who entered the cycle. For across all cycles, n is based on the number of patients who started chemotherapy

<sup>d</sup> The 95% CI and *P* value are calculated using an analysis of variance (ANOVA) model, with differences calculated using pairwise least-squares mean differences

**Supplemental Table 8** Patient-reported mean bone pain (scale 0–10) by cycle and across all cycles: age <65 years (full analysis

set<sup>a</sup>)

| Mean patient-reported bone pain <sup>b</sup> | No prophylaxis (N = 156) | Naproxen 500 mg BID (N = 158) | Loratadine 10 mg QD (N = 162) | Difference (naproxen minus no prophylaxis) | Difference (loratadine minus no prophylaxis) | Difference (loratadine minus naproxen) |
|----------------------------------------------|--------------------------|-------------------------------|-------------------------------|--------------------------------------------|----------------------------------------------|----------------------------------------|
| Cycle 1                                      |                          |                               |                               |                                            |                                              |                                        |
| n <sup>c</sup>                               | 156                      | 158                           | 162                           |                                            |                                              |                                        |
| Mean (SE)                                    | 2.3 (0.2)                | 1.8 (0.2)                     | 1.7 (0.2)                     | −0.5 (0.2)                                 | −0.7 (0.2)                                   | −0.1 (0.2)                             |
| 95% CI <sup>d</sup>                          | (2.0, 2.7)               | (1.5, 2.1)                    | (1.4, 2.0)                    | (−1.0, −0.1)                               | (−1.1, −0.2)                                 | (−0.6, 0.3)                            |
| P value <sup>d</sup>                         |                          |                               |                               | <b>0.028</b>                               | <b>0.006</b>                                 | 0.618                                  |
| Cycle 2                                      |                          |                               |                               |                                            |                                              |                                        |
| n <sup>c</sup>                               | 147                      | 148                           | 158                           |                                            |                                              |                                        |
| Mean (SE)                                    | 1.8 (0.2)                | 1.4 (0.2)                     | 1.4 (0.1)                     | −0.4 (0.2)                                 | −0.4 (0.2)                                   | −0.0 (0.2)                             |
| 95% CI <sup>d</sup>                          | (1.5, 2.2)               | (1.1, 1.8)                    | (1.1, 1.7)                    | (−0.9, 0.1)                                | (−0.9, 0.0)                                  | (−0.4, 0.4)                            |
| P value <sup>d</sup>                         |                          |                               |                               | 0.089                                      | 0.079                                        | 0.992                                  |
| Cycle 3                                      |                          |                               |                               |                                            |                                              |                                        |
| n <sup>c</sup>                               | 136                      | 144                           | 153                           |                                            |                                              |                                        |
| Mean (SE)                                    | 1.8 (0.2)                | 1.4 (0.2)                     | 1.5 (0.2)                     | −0.4 (0.2)                                 | −0.3 (0.2)                                   | 0.1 (0.2)                              |
| 95% CI <sup>d</sup>                          | (1.4, 2.1)               | (1.1, 1.7)                    | (1.2, 1.8)                    | (−0.9, 0.1)                                | (−0.8, 0.2)                                  | (−0.3, 0.6)                            |
| P value <sup>d</sup>                         |                          |                               |                               | 0.108                                      | 0.254                                        | 0.602                                  |
| Cycle 4                                      |                          |                               |                               |                                            |                                              |                                        |
| n <sup>c</sup>                               | 133                      | 140                           | 149                           |                                            |                                              |                                        |
| Mean (SE)                                    | 1.8 (0.2)                | 1.3 (0.2)                     | 1.4 (0.2)                     | −0.6 (0.2)                                 | −0.4 (0.2)                                   | 0.1 (0.2)                              |
| 95% CI <sup>d</sup>                          | (1.5, 2.2)               | (1.0, 1.6)                    | (1.1, 1.7)                    | (−1.0, −0.1)                               | (−0.9, 0.0)                                  | (−0.3, 0.6)                            |
| P value <sup>d</sup>                         |                          |                               |                               | <b>0.020</b>                               | 0.068                                        | 0.574                                  |
| Across all cycles                            |                          |                               |                               |                                            |                                              |                                        |
| n <sup>c</sup>                               | 156                      | 158                           | 162                           |                                            |                                              |                                        |
| Mean (SE)                                    | 2.0 (0.2)                | 1.6 (0.1)                     | 1.5 (0.1)                     | −0.5 (0.2)                                 | −0.5 (0.2)                                   | −0.0 (0.2)                             |
| 95% CI <sup>d</sup>                          | (1.7, 2.4)               | (1.3, 1.9)                    | (1.3, 1.8)                    | (−0.9, −0.0)                               | (−0.9, −0.1)                                 | (−0.4, 0.4)                            |
| P value <sup>d</sup>                         |                          |                               |                               | <b>0.029</b>                               | <b>0.016</b>                                 | 0.857                                  |

Note: All missing values of patient-reported bone pain within any cycle were imputed. P values <0.05 are shown in bold

*BID* twice a day, *CI* confidence interval, *N* number of patients in the analysis set, *QD* once a day, *SE* standard error

<sup>a</sup> The full analysis set includes all patients who received primary prophylaxis with pegfilgrastim

<sup>b</sup> Mean of patient-reported bone pain values is the average of each patient's bone pain values across survey days 1–5 within each cycle. Across all cycles, the mean is the average of each patient-reported bone pain value across all survey days 1–5 across all cycles

<sup>c</sup> For individual cycles, *n* is based on the number of patients who entered the cycle. For across all cycles, *n* is based on the number of patients who started chemotherapy

<sup>d</sup> The 95% *CI* and *P* value are calculated using an analysis of variance (ANOVA) model, with differences calculated using pairwise least-squares mean differences

**Supplemental Table 9** Patient-reported mean bone pain (scale 0–10) by cycle and across all cycles: age ≥65 years (full analysis set<sup>a</sup>)

| Mean patient-reported bone pain <sup>b</sup> | No prophylaxis (N = 35) | Naproxen 500 mg BID (N = 38) | Loratadine 10 mg QD (N = 38) | Difference (naproxen minus no prophylaxis) | Difference (loratadine minus no prophylaxis) | Difference (loratadine minus naproxen) |
|----------------------------------------------|-------------------------|------------------------------|------------------------------|--------------------------------------------|----------------------------------------------|----------------------------------------|
| <b>Cycle 1</b>                               |                         |                              |                              |                                            |                                              |                                        |
| n <sup>c</sup>                               | 35                      | 38                           | 38                           |                                            |                                              |                                        |
| Mean (SE)                                    | 1.5 (0.3)               | 2.0 (0.4)                    | 1.6 (0.3)                    | 0.5 (0.5)                                  | 0.1 (0.5)                                    | -0.4 (0.5)                             |
| 95% CI <sup>d</sup>                          | (0.8, 2.1)              | (1.2, 2.7)                   | (NA, NA)                     | (-0.5, 1.5)                                | (-0.8, 1.0)                                  | (-1.4, 0.6)                            |
| P value <sup>d</sup>                         |                         |                              |                              | 0.301                                      | 0.805                                        | 0.422                                  |
| <b>Cycle 2</b>                               |                         |                              |                              |                                            |                                              |                                        |
| n <sup>c</sup>                               | 31                      | 32                           | 35                           |                                            |                                              |                                        |
| Mean (SE)                                    | 1.0 (0.3)               | 0.8 (0.3)                    | 1.2 (0.3)                    | -0.2 (0.4)                                 | 0.2 (0.4)                                    | 0.4 (0.4)                              |
| 95% CI <sup>d</sup>                          | (0.4, 1.6)              | (0.3, 1.3)                   | (0.6, 1.7)                   | (-1.0, 0.6)                                | (-0.6, 1.0)                                  | (-0.4, 1.2)                            |
| P value <sup>d</sup>                         |                         |                              |                              | 0.630                                      | 0.655                                        | 0.343                                  |
| <b>Cycle 3</b>                               |                         |                              |                              |                                            |                                              |                                        |
| n <sup>c</sup>                               | 29                      | 32                           | 35                           |                                            |                                              |                                        |
| Mean (SE)                                    | 0.7 (0.2)               | 0.8 (0.3)                    | 1.0 (0.3)                    | 0.2 (0.4)                                  | 0.4 (0.4)                                    | 0.2 (0.4)                              |
| 95% CI <sup>d</sup>                          | (0.2, 1.1)              | (0.2, 1.4)                   | (0.5, 1.6)                   | (-0.6, 0.9)                                | (-0.4, 1.1)                                  | (-0.6, 1.0)                            |
| P value <sup>d</sup>                         |                         |                              |                              | 0.694                                      | 0.321                                        | 0.617                                  |
| <b>Cycle 4</b>                               |                         |                              |                              |                                            |                                              |                                        |
| n <sup>c</sup>                               | 29                      | 29                           | 30                           |                                            |                                              |                                        |
| Mean (SE)                                    | 1.0 (0.3)               | 0.9 (0.4)                    | 1.0 (0.3)                    | -0.1 (0.5)                                 | 0.0 (0.4)                                    | 0.1 (0.5)                              |
| 95% CI <sup>d</sup>                          | (0.4, 1.6)              | (0.2, 1.6)                   | (NA, NA)                     | (-1.0, 0.8)                                | (-0.8, 0.9)                                  | (-0.8, 1.0)                            |
| P value <sup>d</sup>                         |                         |                              |                              | 0.816                                      | 0.991                                        | 0.800                                  |
| <b>Across all cycles</b>                     |                         |                              |                              |                                            |                                              |                                        |
| n <sup>c</sup>                               | 35                      | 38                           | 38                           |                                            |                                              |                                        |
| Mean (SE)                                    | 1.1 (0.2)               | 1.4 (0.3)                    | 1.3 (0.3)                    | 0.3 (0.4)                                  | 0.2 (0.4)                                    | -0.1 (0.4)                             |
| 95% CI <sup>d</sup>                          | (0.6, 1.5)              | (0.8, 2.0)                   | (0.8, 1.8)                   | (-0.5, 1.1)                                | (-0.5, 0.9)                                  | (-0.9, 0.7)                            |
| P value <sup>d</sup>                         |                         |                              |                              | 0.419                                      | 0.521                                        | 0.831                                  |

Note: All missing values of patient-reported bone pain within any cycle were imputed

*BID* twice a day, *CI* confidence interval, *N* number of patients in the analysis set, *NA* not available, *QD* once a day, *SE* standard error

<sup>a</sup> The full analysis set includes all patients who received primary prophylaxis with pegfilgrastim

<sup>b</sup> Mean of patient-reported bone pain values is the average of each patient's bone pain values across survey days 1–5 within each cycle. Across all cycles, the mean is the average of each patient-reported bone pain value across all survey days 1–5 across all cycles

<sup>c</sup> For individual cycles, *n* is based on the number of patients who entered the cycle. For across all cycles, *n* is based on the number of patients who started chemotherapy

<sup>d</sup> The 95% *CI* and *P* value are calculated using an analysis of variance (ANOVA) model, with differences calculated using pairwise least-squares mean differences

**Supplemental Table 10** Patient-reported mean bone pain (scale 0–10) by cycle and across all cycles: taxane-based chemotherapy

(full analysis set<sup>a</sup>)

| Mean patient-reported bone pain <sup>b</sup> | No prophylaxis (N = 107) | Naproxen 500 mg BID (N = 111) | Loratadine 10 mg QD (N = 113) | Difference (naproxen minus no prophylaxis) | Difference (loratadine minus no prophylaxis) | Difference (loratadine minus naproxen) |
|----------------------------------------------|--------------------------|-------------------------------|-------------------------------|--------------------------------------------|----------------------------------------------|----------------------------------------|
| <b>Cycle 1</b>                               |                          |                               |                               |                                            |                                              |                                        |
| n <sup>c</sup>                               | 107                      | 111                           | 113                           |                                            |                                              |                                        |
| Mean (SE)                                    | 2.6 (0.2)                | 2.3 (0.2)                     | 2.2 (0.2)                     | -0.3 (0.3)                                 | -0.5 (0.3)                                   | -0.2 (0.3)                             |
| 95% CI <sup>d</sup>                          | (2.2, 3.1)               | (1.9, 2.7)                    | (1.8, 2.6)                    | (-0.9, 0.3)                                | (-1.1, 0.1)                                  | (-0.7, 0.4)                            |
| P value <sup>d</sup>                         |                          |                               |                               | 0.289                                      | 0.122                                        | 0.592                                  |
| <b>Cycle 2</b>                               |                          |                               |                               |                                            |                                              |                                        |
| n <sup>c</sup>                               | 97                       | 98                            | 109                           |                                            |                                              |                                        |
| Mean (SE)                                    | 1.9 (0.2)                | 1.6 (0.2)                     | 1.9 (0.2)                     | -0.3 (0.3)                                 | -0.1 (0.3)                                   | 0.3 (0.3)                              |
| 95% CI <sup>d</sup>                          | (1.5, 2.4)               | (1.2, 2.0)                    | (1.5, 2.3)                    | (-1.0, 0.3)                                | (-0.7, 0.5)                                  | (-0.3, 0.8)                            |
| P value <sup>d</sup>                         |                          |                               |                               | 0.286                                      | 0.838                                        | 0.335                                  |
| <b>Cycle 3</b>                               |                          |                               |                               |                                            |                                              |                                        |
| n <sup>c</sup>                               | 86                       | 97                            | 105                           |                                            |                                              |                                        |
| Mean (SE)                                    | 1.8 (0.2)                | 1.5 (0.2)                     | 1.8 (0.2)                     | -0.2 (0.3)                                 | 0.0 (0.3)                                    | 0.3 (0.3)                              |
| 95% CI <sup>d</sup>                          | (1.3, 2.3)               | (1.1, 2.0)                    | (1.4, 2.2)                    | (-0.9, 0.4)                                | (-0.6, 0.6)                                  | (-0.3, 0.8)                            |
| P value <sup>d</sup>                         |                          |                               |                               | 0.450                                      | 0.957                                        | 0.382                                  |
| <b>Cycle 4</b>                               |                          |                               |                               |                                            |                                              |                                        |
| n <sup>c</sup>                               | 84                       | 91                            | 97                            |                                            |                                              |                                        |
| Mean (SE)                                    | 1.8 (0.2)                | 1.4 (0.2)                     | 1.7 (0.2)                     | -0.5 (0.3)                                 | -0.1 (0.3)                                   | 0.3 (0.3)                              |
| 95% CI <sup>d</sup>                          | (1.4, 2.3)               | (0.9, 1.8)                    | (1.3, 2.1)                    | (-1.1, 0.2)                                | (-0.7, 0.5)                                  | (-0.3, 0.9)                            |
| P value <sup>d</sup>                         |                          |                               |                               | 0.167                                      | 0.709                                        | 0.275                                  |
| <b>Across all cycles</b>                     |                          |                               |                               |                                            |                                              |                                        |
| n <sup>c</sup>                               | 107                      | 111                           | 113                           |                                            |                                              |                                        |
| Mean (SE)                                    | 2.2 (0.2)                | 1.9 (0.2)                     | 1.9 (0.2)                     | -0.3 (0.3)                                 | -0.2 (0.3)                                   | 0.1 (0.3)                              |
| 95% CI <sup>d</sup>                          | (1.8, 2.6)               | (1.5, 2.2)                    | (1.6, 2.3)                    | (-0.8, 0.2)                                | (-0.7, 0.3)                                  | (-0.4, 0.6)                            |
| P value <sup>d</sup>                         |                          |                               |                               | 0.296                                      | 0.399                                        | 0.811                                  |

Note: All missing values of patient-reported bone pain within any cycle were imputed

*BID* twice a day, *CI* confidence interval, *N* number of patients in the analysis set, *QD* once a day, *SE* standard error

<sup>a</sup> The full analysis set includes all patients who received primary prophylaxis with pegfilgrastim

<sup>b</sup> Mean of patient-reported bone pain values is the average of each patient's bone pain values across survey days 1–5 within each cycle. Across all cycles, the mean is the average of each patient-reported bone pain value across all survey days 1–5 across all cycles

<sup>c</sup> For individual cycles, *n* is based on the number of patients who entered the cycle. For across all cycles, *n* is based on the number of patients who started chemotherapy

<sup>d</sup> The 95% *CI* and *P* value are calculated using an analysis of variance (ANOVA) model, with differences calculated using pairwise least-squares mean differences

**Supplemental Table 11** Patient-reported mean bone pain (scale 0–10) by cycle and across all cycles: non-taxane-based chemotherapy (full analysis set<sup>a</sup>)

| Mean patient-reported bone pain <sup>b</sup> | No prophylaxis (N = 84) | Naproxen 500 mg BID (N = 85) | Loratadine 10 mg QD (N = 87) | Difference (naproxen minus no prophylaxis) | Difference (loratadine minus no prophylaxis) | Difference (loratadine minus naproxen) |
|----------------------------------------------|-------------------------|------------------------------|------------------------------|--------------------------------------------|----------------------------------------------|----------------------------------------|
| Cycle 1                                      |                         |                              |                              |                                            |                                              |                                        |
| n <sup>c</sup>                               | 84                      | 85                           | 87                           |                                            |                                              |                                        |
| Mean (SE)                                    | 1.6 (0.2)               | 1.2 (0.2)                    | 1.0 (0.2)                    | -0.4 (0.3)                                 | -0.6 (0.3)                                   | -0.2 (0.3)                             |
| 95% CI <sup>d</sup>                          | (1.2, 2.0)              | (0.8, 1.6)                   | (0.7, 1.3)                   | (-1.0, 0.2)                                | (-1.1, -0.1)                                 | (-0.7, 0.3)                            |
| P value <sup>d</sup>                         |                         |                              |                              | 0.175                                      | <b>0.024</b>                                 | 0.478                                  |
| Cycle 2                                      |                         |                              |                              |                                            |                                              |                                        |
| n <sup>c</sup>                               | 81                      | 82                           | 84                           |                                            |                                              |                                        |
| Mean (SE)                                    | 1.4 (0.2)               | 1.0 (0.2)                    | 0.8 (0.1)                    | -0.4 (0.3)                                 | -0.7 (0.2)                                   | -0.2 (0.2)                             |
| 95% CI <sup>d</sup>                          | (1.0, 1.8)              | (0.7, 1.4)                   | (0.5, 1.0)                   | (-0.9, 0.1)                                | (-1.1, -0.2)                                 | (-0.7, 0.2)                            |
| P value <sup>d</sup>                         |                         |                              |                              | 0.120                                      | <b>0.007</b>                                 | 0.295                                  |
| Cycle 3                                      |                         |                              |                              |                                            |                                              |                                        |
| n <sup>c</sup>                               | 79                      | 79                           | 83                           |                                            |                                              |                                        |
| Mean (SE)                                    | 1.4 (0.2)               | 1.0 (0.2)                    | 0.9 (0.2)                    | -0.4 (0.3)                                 | -0.4 (0.3)                                   | -0.0 (0.3)                             |
| 95% CI <sup>d</sup>                          | (1.0, 1.8)              | (0.6, 1.3)                   | (0.6, 1.2)                   | (-1.0, 0.1)                                | (-1.0, 0.1)                                  | (-0.5, 0.5)                            |
| P value <sup>d</sup>                         |                         |                              |                              | 0.146                                      | 0.094                                        | 0.876                                  |
| Cycle 4                                      |                         |                              |                              |                                            |                                              |                                        |
| n <sup>c</sup>                               | 78                      | 78                           | 82                           |                                            |                                              |                                        |
| Mean (SE)                                    | 1.5 (0.2)               | 1.0 (0.2)                    | 0.9 (0.2)                    | -0.5 (0.3)                                 | -0.7 (0.3)                                   | -0.1 (0.3)                             |
| 95% CI <sup>d</sup>                          | (1.1, 2.0)              | (0.7, 1.4)                   | (0.5, 1.2)                   | (-1.1, 0.0)                                | (-1.2, -0.1)                                 | (-0.6, 0.4)                            |
| P value <sup>d</sup>                         |                         |                              |                              | 0.069                                      | <b>0.023</b>                                 | 0.631                                  |
| Across all cycles                            |                         |                              |                              |                                            |                                              |                                        |
| n <sup>c</sup>                               | 84                      | 85                           | 87                           |                                            |                                              |                                        |
| Mean (SE)                                    | 1.5 (0.2)               | 1.1 (0.2)                    | 0.9 (0.1)                    | -0.4 (0.2)                                 | -0.6 (0.2)                                   | -0.2 (0.2)                             |
| 95% CI <sup>d</sup>                          | (1.1, 1.8)              | (0.8, 1.4)                   | (0.6, 1.2)                   | (-0.9, 0.1)                                | (-1.0, -0.1)                                 | (-0.6, 0.3)                            |
| P value <sup>d</sup>                         |                         |                              |                              | 0.119                                      | <b>0.014</b>                                 | 0.420                                  |

Note: All missing values of patient-reported bone pain within any cycle were imputed. P values <0.05 are shown in bold



*BID* twice a day, *CI* confidence interval, *N* number of patients in the analysis set, *QD* once a day, *SE* standard error

<sup>a</sup> The full analysis set includes all patients who received primary prophylaxis with pegfilgrastim

<sup>b</sup> Mean of patient-reported bone pain values is the average of each patient's bone pain values across survey days 1–5 within each cycle. Across all cycles, the mean is the average of each patient-reported bone pain value across all survey days 1–5 across all cycles

<sup>c</sup> For individual cycles, *n* is based on the number of patients who entered the cycle. For across all cycles, *n* is based on the number of patients who started chemotherapy

<sup>d</sup> The 95% *CI* and *P* value are calculated using an analysis of variance (ANOVA) model, with differences calculated using pairwise least-squares mean differences

**Supplemental Table 12** Patient-reported AUC for bone pain by cycle and across all cycles (full analysis set<sup>a</sup>)

| Patient-reported bone pain AUC <sup>b</sup> | No prophylaxis (N=191) | Naproxen 500 mg BID (N=196) | Loratadine 10 mg QD (N=200) | Difference (naproxen minus no prophylaxis) | Difference (loratadine minus no prophylaxis) | Difference (loratadine minus naproxen) |
|---------------------------------------------|------------------------|-----------------------------|-----------------------------|--------------------------------------------|----------------------------------------------|----------------------------------------|
| <b>Cycle 1</b>                              |                        |                             |                             |                                            |                                              |                                        |
| n <sup>c</sup>                              | 191                    | 196                         | 200                         |                                            |                                              |                                        |
| Mean (SE)                                   | 9.3 (0.7)              | 7.7 (0.6)                   | 7.0 (0.6)                   | -1.5 (0.9)                                 | -2.3 (0.9)                                   | -0.7 (0.9)                             |
| 95% CI <sup>d</sup>                         | (7.9, 10.6)            | (6.5, 9.0)                  | (5.8, 8.2)                  | (-3.4, 0.3)                                | (-4.0, -0.5)                                 | (-2.5, 1.0)                            |
| P value <sup>d</sup>                        |                        |                             |                             | 0.100                                      | <b>0.012</b>                                 | 0.393                                  |
| <b>Cycle 2</b>                              |                        |                             |                             |                                            |                                              |                                        |
| n <sup>c</sup>                              | 178                    | 180                         | 193                         |                                            |                                              |                                        |
| Mean (SE)                                   | 7.3 (0.7)              | 5.6 (0.6)                   | 5.9 (0.5)                   | -1.6 (0.9)                                 | -1.4 (0.9)                                   | 0.2 (0.8)                              |
| 95% CI <sup>d</sup>                         | (6.0, 8.5)             | (4.4, 6.8)                  | (4.8, 6.9)                  | (-3.4, 0.1)                                | (-3.1, 0.3)                                  | (-1.3, 1.8)                            |
| P value <sup>d</sup>                        |                        |                             |                             | 0.065                                      | 0.105                                        | 0.760                                  |
| <b>Cycle 3</b>                              |                        |                             |                             |                                            |                                              |                                        |
| n <sup>c</sup>                              | 165                    | 176                         | 188                         |                                            |                                              |                                        |
| Mean (SE)                                   | 6.8 (0.7)              | 5.5 (0.6)                   | 6.1 (0.6)                   | -1.3 (0.9)                                 | -0.7 (0.9)                                   | 0.6 (0.8)                              |
| 95% CI <sup>d</sup>                         | (5.5, 8.1)             | (4.3, 6.7)                  | (4.9, 7.2)                  | (-3.1, 0.5)                                | (-2.5, 1.0)                                  | (-1.1, 2.3)                            |
| P value <sup>d</sup>                        |                        |                             |                             | 0.143                                      | 0.404                                        | 0.491                                  |
| <b>Cycle 4</b>                              |                        |                             |                             |                                            |                                              |                                        |
| n <sup>c</sup>                              | 162                    | 169                         | 179                         |                                            |                                              |                                        |
| Mean (SE)                                   | 7.2 (0.7)              | 5.2 (0.6)                   | 5.6 (0.6)                   | -2.0 (0.9)                                 | -1.6 (0.9)                                   | 0.5 (0.9)                              |
| 95% CI <sup>d</sup>                         | (5.9, 8.6)             | (3.9, 6.4)                  | (4.5, 6.8)                  | (-3.9, -0.2)                               | (-3.3, 0.2)                                  | (-1.2, 2.1)                            |
| P value <sup>d</sup>                        |                        |                             |                             | <b>0.027</b>                               | 0.077                                        | 0.584                                  |
| <b>Across all cycles</b>                    |                        |                             |                             |                                            |                                              |                                        |
| n <sup>c</sup>                              | 191                    | 196                         | 200                         |                                            |                                              |                                        |
| Mean (SE)                                   | 8.0 (0.6)              | 6.6 (0.5)                   | 6.3 (0.5)                   | -1.4 (0.8)                                 | -1.6 (0.8)                                   | -0.2 (0.7)                             |
| 95% CI <sup>d</sup>                         | (6.8, 9.1)             | (5.5, 7.7)                  | (5.4, 7.3)                  | (-3.0, 0.2)                                | (-3.1, -0.1)                                 | (-1.7, 1.2)                            |
| P value <sup>d</sup>                        |                        |                             |                             | 0.078                                      | <b>0.033</b>                                 | 0.757                                  |

Note: All missing values of patient-reported bone pain within any cycle were imputed. P values <0.05 are shown in bold  
AUC area under the curve, BID twice a day, CI confidence interval, N number of patients in the analysis set, QD once a day, SE standard error

<sup>a</sup> The full analysis set includes all patients who received primary prophylaxis with pegfilgrastim

<sup>b</sup> Patient-reported bone pain AUC is calculated using the trapezoidal rule with bone pain scores from day 1–5 for each cycle. The AUC across all cycles is the average of the AUCs across the cycles

<sup>c</sup> For individual cycles, n and percentage are based on the number of subjects who enter the cycle. For "All Cycles", n and percentage are based on the number of subjects who started chemotherapy

<sup>d</sup> The 95% CI and *P* value are calculated using an analysis of variance (ANOVA) model, with differences calculated using pairwise least-squares mean differences

**Supplemental Table 13** Patient-reported AUC for bone pain by cycle and across all cycles: age <65 years (full analysis set<sup>a</sup>)

| Patient-reported bone pain AUC <sup>b</sup> | No prophylaxis (N=156) | Naproxen 500 mg BID (N=158) | Loratadine 10 mg QD (N=162) | Difference (naproxen minus no prophylaxis) | Difference (loratadine minus no prophylaxis) | Difference (loratadine minus naproxen) |
|---------------------------------------------|------------------------|-----------------------------|-----------------------------|--------------------------------------------|----------------------------------------------|----------------------------------------|
| <b>Cycle 1</b>                              |                        |                             |                             |                                            |                                              |                                        |
| n <sup>c</sup>                              | 156                    | 158                         | 162                         |                                            |                                              |                                        |
| Mean (SE)                                   | 9.9 (0.8)              | 7.6 (0.7)                   | 7.1 (0.7)                   | -2.3 (1.0)                                 | -2.9 (1.0)                                   | -0.6 (1.0)                             |
| 95% CI <sup>d</sup>                         | (8.4, 11.5)            | (6.3, 9.0)                  | (5.8, 8.4)                  | (-4.3, -0.2)                               | (-4.8, -0.9)                                 | (-2.5, 1.3)                            |
| P value <sup>d</sup>                        |                        |                             |                             | <b>0.028</b>                               | <b>0.005</b>                                 | 0.555                                  |
| <b>Cycle 2</b>                              |                        |                             |                             |                                            |                                              |                                        |
| n <sup>c</sup>                              | 147                    | 148                         | 158                         |                                            |                                              |                                        |
| Mean (SE)                                   | 7.9 (0.7)              | 6.1 (0.7)                   | 6.0 (0.6)                   | -1.8 (1.0)                                 | -1.8 (1.0)                                   | -0.0 (0.9)                             |
| 95% CI <sup>d</sup>                         | (6.4, 9.3)             | (4.8, 7.4)                  | (4.8, 7.2)                  | (-3.8, 0.2)                                | (-3.7, 0.1)                                  | (-1.8, 1.7)                            |
| P value <sup>d</sup>                        |                        |                             |                             | 0.075                                      | 0.060                                        | 0.960                                  |
| <b>Cycle 3</b>                              |                        |                             |                             |                                            |                                              |                                        |
| n <sup>c</sup>                              | 136                    | 144                         | 153                         |                                            |                                              |                                        |
| Mean (SE)                                   | 7.6 (0.8)              | 5.9 (0.7)                   | 6.4 (0.7)                   | -1.7 (1.0)                                 | -1.2 (1.0)                                   | 0.5 (1.0)                              |
| 95% CI <sup>d</sup>                         | (6.1, 9.2)             | (4.6, 7.3)                  | (5.1, 7.7)                  | (-3.7, 0.3)                                | (-3.2, 0.8)                                  | (-1.4, 2.4)                            |
| P value <sup>d</sup>                        |                        |                             |                             | 0.096                                      | 0.227                                        | 0.606                                  |
| <b>Cycle 4</b>                              |                        |                             |                             |                                            |                                              |                                        |
| n <sup>c</sup>                              | 133                    | 140                         | 149                         |                                            |                                              |                                        |
| Mean (SE)                                   | 7.9 (0.8)              | 5.5 (0.7)                   | 5.9 (0.6)                   | -2.4 (1.0)                                 | -2.0 (1.0)                                   | 0.4 (0.9)                              |
| 95% CI <sup>d</sup>                         | (6.4, 9.4)             | (4.1, 6.8)                  | (4.6, 7.2)                  | (-4.4, -0.4)                               | (-3.9, -0.0)                                 | (-1.4, 2.3)                            |
| P value <sup>d</sup>                        |                        |                             |                             | <b>0.020</b>                               | <b>0.049</b>                                 | 0.654                                  |
| <b>Across all cycles</b>                    |                        |                             |                             |                                            |                                              |                                        |
| n <sup>c</sup>                              | 156                    | 158                         | 162                         |                                            |                                              |                                        |
| Mean (SE)                                   | 8.7 (0.7)              | 6.7 (0.6)                   | 6.5 (0.6)                   | -2.0 (0.9)                                 | -2.2 (0.9)                                   | -0.2 (0.8)                             |
| 95% CI <sup>d</sup>                         | (7.4, 10.0)            | (5.6, 7.9)                  | (5.4, 7.6)                  | (-3.7, -0.2)                               | (-3.9, -0.5)                                 | (-1.9, 1.4)                            |
| P value <sup>d</sup>                        |                        |                             |                             | <b>0.028</b>                               | <b>0.010</b>                                 | 0.770                                  |

Note: All missing values of patient-reported bone pain within any cycle were imputed. P values <0.05 are shown in bold AUC area under the curve, BID twice a day, CI confidence interval, N number of patients in the analysis set, QD once a day, SE standard error

<sup>a</sup> The full analysis set includes all patients who received primary prophylaxis with pegfilgrastim

<sup>b</sup> Patient-reported bone pain AUC is calculated using the trapezoidal rule with bone pain scores from day 1–5 for each cycle. The AUC across all cycles is the average of the AUCs across the cycles

<sup>c</sup> For individual cycles, n and percentage are based on the number of subjects who enter the cycle. For "All Cycles", n and percentage are based on the number of subjects who started chemotherapy

<sup>d</sup> The 95% CI and *P* value are calculated using an analysis of variance (ANOVA) model, with differences calculated using pairwise least-squares mean differences

**Supplemental Table 14** Patient-reported AUC for bone pain by cycle and across all cycles: age ≥65 years (full analysis set<sup>a</sup>)

| Patient-reported bone pain AUC <sup>b</sup> | No prophylaxis (N=35) | Naproxen 500 mg BID (N=38) | Loratadine 10 mg QD (N=38) | Difference (naproxen minus no prophylaxis) | Difference (loratadine minus no prophylaxis) | Difference (loratadine minus naproxen) |
|---------------------------------------------|-----------------------|----------------------------|----------------------------|--------------------------------------------|----------------------------------------------|----------------------------------------|
| <b>Cycle 1</b>                              |                       |                            |                            |                                            |                                              |                                        |
| n <sup>c</sup>                              | 35                    | 38                         | 38                         |                                            |                                              |                                        |
| Mean (SE)                                   | 6.3 (1.3)             | 8.2 (1.6)                  | 6.7 (1.4)                  | 1.8 (2.1)                                  | 0.4 (2.0)                                    | -1.5 (2.1)                             |
| 95% CI <sup>d</sup>                         | (3.7, 9.0)            | (5.1, 11.2)                | (NA, NA)                   | (-2.2, 5.9)                                | (-3.5, 4.2)                                  | (-5.6, 2.6)                            |
| P value <sup>d</sup>                        |                       |                            |                            | 0.374                                      | 0.854                                        | 0.481                                  |
| <b>Cycle 2</b>                              |                       |                            |                            |                                            |                                              |                                        |
| n <sup>c</sup>                              | 31                    | 32                         | 35                         |                                            |                                              |                                        |
| Mean (SE)                                   | 4.3 (1.3)             | 3.4 (1.1)                  | 5.0 (1.2)                  | -0.9 (1.7)                                 | 0.7 (1.7)                                    | 1.6 (1.7)                              |
| 95% CI <sup>d</sup>                         | (1.8, 6.8)            | (1.2, 5.6)                 | (2.7, 7.4)                 | (-4.2, 2.4)                                | (-2.7, 4.1)                                  | (-1.7, 4.9)                            |
| P value <sup>d</sup>                        |                       |                            |                            | 0.590                                      | 0.686                                        | 0.333                                  |
| <b>Cycle 3</b>                              |                       |                            |                            |                                            |                                              |                                        |
| n <sup>c</sup>                              | 29                    | 32                         | 35                         |                                            |                                              |                                        |
| Mean (SE)                                   | 2.8 (0.9)             | 3.4 (1.2)                  | 4.5 (1.2)                  | 0.6 (1.6)                                  | 1.6 (1.6)                                    | 1.0 (1.7)                              |
| 95% CI <sup>d</sup>                         | (1.0, 4.7)            | (1.0, 5.9)                 | (2.1, 6.8)                 | (-2.5, 3.7)                                | (-1.4, 4.7)                                  | (-2.4, 4.4)                            |
| P value <sup>d</sup>                        |                       |                            |                            | 0.712                                      | 0.292                                        | 0.546                                  |
| <b>Cycle 4</b>                              |                       |                            |                            |                                            |                                              |                                        |
| n <sup>c</sup>                              | 29                    | 29                         | 30                         |                                            |                                              |                                        |
| Mean (SE)                                   | 4.2 (1.3)             | 3.6 (1.4)                  | 4.3 (1.3)                  | -0.5 (1.9)                                 | 0.1 (1.8)                                    | 0.6 (1.9)                              |
| 95% CI <sup>d</sup>                         | (1.6, 6.7)            | (0.8, 6.5)                 | (NA, NA)                   | (-4.4, 3.3)                                | (-3.4, 3.7)                                  | (-3.1, 4.4)                            |
| P value <sup>d</sup>                        |                       |                            |                            | 0.783                                      | 0.952                                        | 0.736                                  |
| <b>Across all cycles</b>                    |                       |                            |                            |                                            |                                              |                                        |
| n <sup>c</sup>                              | 35                    | 38                         | 38                         |                                            |                                              |                                        |
| Mean (SE)                                   | 4.7 (1.0)             | 5.9 (1.3)                  | 5.7 (1.2)                  | 1.2 (1.6)                                  | 1.0 (1.5)                                    | -0.2 (1.7)                             |
| 95% CI <sup>d</sup>                         | (2.7, 6.6)            | (3.3, 8.4)                 | (3.4, 7.9)                 | (-2.0, 4.4)                                | (-2.1, 4.0)                                  | (-3.6, 3.2)                            |
| P value <sup>d</sup>                        |                       |                            |                            | 0.472                                      | 0.530                                        | 0.908                                  |

Note: All missing values of patient-reported bone pain within any cycle were imputed

AUC area under the curve, BID twice a day, CI confidence interval, N number of patients in the analysis set, NA not available, QD once a day, SE standard error

<sup>a</sup> The full analysis set includes all patients who received primary prophylaxis with pegfilgrastim

<sup>b</sup> Patient-reported bone pain AUC is calculated using the trapezoidal rule with bone pain scores from day 1–5 for each cycle. The AUC across all cycles is the average of the AUCs across the cycles

<sup>c</sup> For individual cycles, n and percentage are based on the number of subjects who enter the cycle. For "All Cycles", n and percentage are based on the number of subjects who started chemotherapy

<sup>d</sup> The 95% CI and *P* value are calculated using an analysis of variance (ANOVA) model, with differences calculated using pairwise least-squares mean differences

**Supplemental Table 15** Patient-reported AUC for bone pain by cycle and across all cycles: taxane-based chemotherapy (full analysis set<sup>a</sup>)

| Patient-reported bone pain AUC <sup>b</sup> | No prophylaxis (N=107) | Naproxen 500 mg BID (N=111) | Loratadine 10 mg QD (N=113) | Difference (naproxen minus no prophylaxis) | Difference (loratadine minus no prophylaxis) | Difference (loratadine minus naproxen) |
|---------------------------------------------|------------------------|-----------------------------|-----------------------------|--------------------------------------------|----------------------------------------------|----------------------------------------|
| <b>Cycle 1</b>                              |                        |                             |                             |                                            |                                              |                                        |
| n <sup>c</sup>                              | 107                    | 111                         | 113                         |                                            |                                              |                                        |
| Mean (SE)                                   | 11.3 (1.0)             | 10.0 (0.8)                  | 9.3 (0.9)                   | -1.4 (1.3)                                 | -2.1 (1.3)                                   | -0.7 (1.2)                             |
| 95% CI <sup>d</sup>                         | (9.4, 13.2)            | (8.3, 11.6)                 | (7.5, 11.0)                 | (-3.9, 1.1)                                | (-4.6, 0.5)                                  | (-3.1, 1.7)                            |
| P value <sup>d</sup>                        |                        |                             |                             | 0.285                                      | 0.109                                        | 0.557                                  |
| <b>Cycle 2</b>                              |                        |                             |                             |                                            |                                              |                                        |
| n <sup>c</sup>                              | 97                     | 98                          | 109                         |                                            |                                              |                                        |
| Mean (SE)                                   | 8.2 (1.0)              | 6.8 (0.9)                   | 7.9 (0.8)                   | -1.5 (1.3)                                 | -0.3 (1.3)                                   | 1.2 (1.2)                              |
| 95% CI <sup>d</sup>                         | (6.3, 10.2)            | (5.1, 8.5)                  | (6.4, 9.5)                  | (-4.1, 1.1)                                | (-2.8, 2.2)                                  | (-1.2, 3.5)                            |
| P value <sup>d</sup>                        |                        |                             |                             | 0.270                                      | 0.816                                        | 0.329                                  |
| <b>Cycle 3</b>                              |                        |                             |                             |                                            |                                              |                                        |
| n <sup>c</sup>                              | 86                     | 97                          | 105                         |                                            |                                              |                                        |
| Mean (SE)                                   | 7.7 (1.0)              | 6.6 (0.9)                   | 7.7 (0.9)                   | -1.1 (1.4)                                 | 0.0 (1.3)                                    | 1.1 (1.3)                              |
| 95% CI <sup>d</sup>                         | (5.7, 9.7)             | (4.8, 8.4)                  | (6.0, 9.4)                  | (-3.8, 1.6)                                | (-2.6, 2.6)                                  | (-1.3, 3.6)                            |
| P value <sup>d</sup>                        |                        |                             |                             | 0.422                                      | 0.985                                        | 0.373                                  |
| <b>Cycle 4</b>                              |                        |                             |                             |                                            |                                              |                                        |
| n <sup>c</sup>                              | 84                     | 91                          | 97                          |                                            |                                              |                                        |
| Mean (SE)                                   | 7.7 (1.0)              | 5.9 (1.0)                   | 7.2 (0.8)                   | -1.8 (1.4)                                 | -0.5 (1.3)                                   | 1.3 (1.3)                              |
| 95% CI <sup>d</sup>                         | (5.8, 9.6)             | (4.0, 7.8)                  | (5.6, 8.9)                  | (-4.5, 0.9)                                | (-3.0, 2.0)                                  | (-1.2, 3.8)                            |
| P value <sup>d</sup>                        |                        |                             |                             | 0.181                                      | 0.698                                        | 0.300                                  |
| <b>Across all cycles</b>                    |                        |                             |                             |                                            |                                              |                                        |
| n <sup>c</sup>                              | 107                    | 111                         | 113                         |                                            |                                              |                                        |
| Mean (SE)                                   | 9.2 (0.8)              | 8.0 (0.8)                   | 8.2 (0.7)                   | -1.2 (1.1)                                 | -1.0 (1.1)                                   | 0.2 (1.1)                              |
| 95% CI <sup>d</sup>                         | (7.6, 10.9)            | (6.5, 9.5)                  | (6.8, 9.6)                  | (-3.4, 1.0)                                | (-3.1, 1.2)                                  | (-1.8, 2.3)                            |
| P value <sup>d</sup>                        |                        |                             |                             | 0.284                                      | 0.368                                        | 0.832                                  |

Note: All missing values of patient-reported bone pain within any cycle were imputed



*AUC* area under the curve, *BID* twice a day, *CI* confidence interval, *N* number of patients in the analysis set, *QD* once a day, *SE* standard error

<sup>a</sup> The full analysis set includes all patients who received primary prophylaxis with pegfilgrastim

<sup>b</sup> Patient-reported bone pain AUC is calculated using the trapezoidal rule with bone pain scores from day 1–5 for each cycle. The AUC across all cycles is the average of the AUCs across the cycles

<sup>c</sup> For individual cycles, *n* and percentage are based on the number of subjects who enter the cycle. For "All Cycles", *n* and percentage are based on the number of subjects who started chemotherapy

<sup>d</sup> The 95% CI and *P* value are calculated using an analysis of variance (ANOVA) model, with differences calculated using pairwise least-squares mean differences

**Supplemental Table 16** Patient-reported AUC for bone pain by cycle and across all cycles: non-taxane-based chemotherapy (full analysis set<sup>a</sup>)

| Patient-reported bone pain AUC <sup>b</sup> | No prophylaxis (N=84) | Naproxen 500 mg BID (N=85) | Loratadine 10 mg QD (N=87) | Difference (naproxen minus no prophylaxis) | Difference (loratadine minus no prophylaxis) | Difference (loratadine minus naproxen) |
|---------------------------------------------|-----------------------|----------------------------|----------------------------|--------------------------------------------|----------------------------------------------|----------------------------------------|
| <b>Cycle 1</b>                              |                       |                            |                            |                                            |                                              |                                        |
| n <sup>c</sup>                              | 84                    | 85                         | 87                         |                                            |                                              |                                        |
| Mean (SE)                                   | 6.7 (0.9)             | 4.8 (0.9)                  | 4.1 (0.7)                  | -1.8 (1.2)                                 | -2.6 (1.1)                                   | -0.8 (1.1)                             |
| 95% CI <sup>d</sup>                         | (5.0, 8.4)            | (3.2, 6.5)                 | (2.8, 5.4)                 | (-4.2, 0.6)                                | (-4.7, -0.5)                                 | (-2.9, 1.3)                            |
| P value <sup>d</sup>                        |                       |                            |                            | 0.135                                      | <b>0.016</b>                                 | 0.475                                  |
| <b>Cycle 2</b>                              |                       |                            |                            |                                            |                                              |                                        |
| n <sup>c</sup>                              | 81                    | 82                         | 84                         |                                            |                                              |                                        |
| Mean (SE)                                   | 6.1 (0.8)             | 4.2 (0.7)                  | 3.1 (0.6)                  | -1.9 (1.1)                                 | -2.9 (1.0)                                   | -1.1 (0.9)                             |
| 95% CI <sup>d</sup>                         | (4.4, 7.7)            | (2.8, 5.7)                 | (2.0, 4.3)                 | (-4.0, 0.3)                                | (-4.9, -1.0)                                 | (-2.9, 0.8)                            |
| P value <sup>d</sup>                        |                       |                            |                            | 0.094                                      | <b>0.004</b>                                 | 0.257                                  |
| <b>Cycle 3</b>                              |                       |                            |                            |                                            |                                              |                                        |
| n <sup>c</sup>                              | 79                    | 79                         | 83                         |                                            |                                              |                                        |
| Mean (SE)                                   | 5.8 (0.9)             | 4.1 (0.8)                  | 4.0 (0.7)                  | -1.7 (1.2)                                 | -1.9 (1.1)                                   | -0.1 (1.0)                             |
| 95% CI <sup>d</sup>                         | (4.1, 7.6)            | (2.6, 5.6)                 | (2.6, 5.3)                 | (-4.0, 0.5)                                | (-4.1, 0.3)                                  | (-2.2, 1.9)                            |
| P value <sup>d</sup>                        |                       |                            |                            | 0.134                                      | 0.093                                        | 0.900                                  |
| <b>Cycle 4</b>                              |                       |                            |                            |                                            |                                              |                                        |
| n <sup>c</sup>                              | 78                    | 78                         | 82                         |                                            |                                              |                                        |
| Mean (SE)                                   | 6.7 (1.0)             | 4.3 (0.8)                  | 3.8 (0.7)                  | -2.4 (1.2)                                 | -2.9 (1.2)                                   | -0.6 (1.0)                             |
| 95% CI <sup>d</sup>                         | (4.7, 8.6)            | (2.8, 5.8)                 | (2.3, 5.2)                 | (-4.8, 0.1)                                | (-5.3, -0.5)                                 | (-2.6, 1.5)                            |
| P value <sup>d</sup>                        |                       |                            |                            | 0.057                                      | <b>0.016</b>                                 | 0.594                                  |
| <b>Across all cycles</b>                    |                       |                            |                            |                                            |                                              |                                        |
| n <sup>c</sup>                              | 84                    | 85                         | 87                         |                                            |                                              |                                        |
| Mean (SE)                                   | 6.4 (0.8)             | 4.7 (0.7)                  | 3.9 (0.6)                  | -1.7 (1.0)                                 | -2.5 (1.0)                                   | -0.8 (0.9)                             |
| 95% CI <sup>d</sup>                         | (4.9, 7.9)            | (3.3, 6.1)                 | (2.7, 5.0)                 | (-3.7, 0.3)                                | (-4.4, -0.6)                                 | (-2.6, 1.0)                            |
| P value <sup>d</sup>                        |                       |                            |                            | 0.103                                      | <b>0.009</b>                                 | 0.380                                  |

Note: All missing values of patient-reported bone pain within any cycle were imputed. P values <0.05 are shown in bold

*AUC* area under the curve, *BID* twice a day, *CI* confidence interval, *N* number of patients in the analysis set, *QD* once a day, *SE* standard error

<sup>a</sup> The full analysis set includes all patients who received primary prophylaxis with pegfilgrastim

<sup>b</sup> Patient-reported bone pain AUC is calculated using the trapezoidal rule with bone pain scores from day 1–5 for each cycle. The AUC across all cycles is the average of the AUCs across the cycles

<sup>c</sup> For individual cycles, *n* and percentage are based on the number of subjects who enter the cycle. For "All Cycles", *n* and percentage are based on the number of subjects who started chemotherapy

<sup>d</sup> The 95% *CI* and *P* value are calculated using an analysis of variance (ANOVA) model, with differences calculated using pairwise least-squares mean differences

**Supplemental Table 17** Patients with additional bone pain medications from medication logs

(full analysis set<sup>a</sup>)

|                                     | No prophylaxis<br>(N=191) | Naproxen<br>500 mg BID<br>(N=196) | Loratadine<br>10 mg QD<br>(N=200) | Total<br>(N=587) |
|-------------------------------------|---------------------------|-----------------------------------|-----------------------------------|------------------|
| Cycle 1                             |                           |                                   |                                   |                  |
| n (%) <sup>b</sup>                  | 191 (100.0)               | 196 (100.0)                       | 200 (100.0)                       | 587 (100.0)      |
| Patients with bone pain medications | 122                       | 65                                | 85                                | 272              |
| Percentage <sup>c</sup>             | 63.9                      | 33.2                              | 42.5                              | 46.3             |
| 95% CI <sup>d</sup>                 | (56.6, 70.7)              | (26.6, 40.2)                      | (35.6, 49.7)                      | (42.2, 50.5)     |
| Cycle 2                             |                           |                                   |                                   |                  |
| n (%) <sup>b</sup>                  | 178 (93.2)                | 180 (91.8)                        | 193 (96.5)                        | 551 (93.9)       |
| Patients with bone pain medications | 88                        | 47                                | 75                                | 210              |
| Percentage <sup>c</sup>             | 49.4                      | 26.1                              | 38.9                              | 38.1             |
| 95% CI <sup>d</sup>                 | (41.9, 57.0)              | (19.9, 33.2)                      | (31.9, 46.1)                      | (34.0, 42.3)     |
| Cycle 3                             |                           |                                   |                                   |                  |
| n (%) <sup>b</sup>                  | 165 (86.4)                | 176 (89.8)                        | 188 (94.0)                        | 529 (90.1)       |
| Patients with bone pain medications | 72                        | 40                                | 66                                | 178              |
| Percentage <sup>c</sup>             | 43.6                      | 22.7                              | 35.1                              | 33.6             |
| 95% CI <sup>d</sup>                 | (35.9, 51.6)              | (16.8, 29.6)                      | (28.3, 42.4)                      | (29.6, 37.9)     |
| Cycle 4                             |                           |                                   |                                   |                  |
| n (%) <sup>b</sup>                  | 162 (84.8)                | 169 (86.2)                        | 179 (89.5)                        | 510 (86.9)       |
| Patients with bone pain medications | 72                        | 42                                | 60                                | 174              |
| Percentage <sup>c</sup>             | 44.4                      | 24.9                              | 33.5                              | 34.1             |
| 95% CI <sup>d</sup>                 | (36.6, 52.4)              | (18.5, 32.1)                      | (26.7, 40.9)                      | (30.0, 38.4)     |
| All cycles                          |                           |                                   |                                   |                  |
| n (%) <sup>b</sup>                  | 191 (100.0)               | 196 (100.0)                       | 200 (100.0)                       | 587 (100.0)      |
| Patients with bone pain medications | 141                       | 88                                | 115                               | 344              |
| Percentage <sup>c</sup>             | 73.8                      | 44.9                              | 57.5                              | 58.6             |
| 95% CI <sup>d</sup>                 | (67.0, 79.9)              | (37.8, 52.1)                      | (50.3, 64.4)                      | (54.5, 62.6)     |

*BID* twice a day, *CI* confidence interval, *N* number of patients in the analysis set, *QD* once a day

<sup>a</sup> The full analysis set includes all patients who received primary prophylaxis with pegfilgrastim

<sup>b</sup> n = number of patients who entered the cycle. For all cycles, n = number of patients who started chemotherapy

<sup>c</sup> Percentage is based on the number of patients who entered the cycle. For all cycles, the percentage is based on the number of patients who started chemotherapy

<sup>d</sup> CI for the percentage is calculated using binomial distribution

**Supplemental Table 18** Additional analgesics, antihistamines, and NSAIDs from medication

logs by preferred term (full analysis set<sup>a</sup>)

|                                        | No<br>prophylaxis<br>(N=191)<br>n (%) | Naproxen<br>500 mg BID<br>(N=196)<br>n (%) | Loratadine<br>10 mg QD<br>(N=200)<br>n (%) | Total<br>(N=587)<br>n (%) |
|----------------------------------------|---------------------------------------|--------------------------------------------|--------------------------------------------|---------------------------|
| Number of patients with analgesics     | 126 (66.0)                            | 84 (42.9)                                  | 99 (49.5)                                  | 309 (52.6)                |
| Paracetamol                            | 74 (38.7)                             | 50 (25.5)                                  | 58 (29.0)                                  | 182 (31.0)                |
| Ibuprofen                              | 54 (28.3)                             | 21 (10.7)                                  | 37 (18.5)                                  | 112 (19.1)                |
| Vicodin                                | 19 (9.9)                              | 16 (8.2)                                   | 10 (5.0)                                   | 45 (7.7)                  |
| Oxycodone                              | 9 (4.7)                               | 5 (2.6)                                    | 7 (3.5)                                    | 21 (3.6)                  |
| Oxycocet                               | 7 (3.7)                               | 8 (4.1)                                    | 5 (2.5)                                    | 20 (3.4)                  |
| Hydrocodone                            | 4 (2.1)                               | 8 (4.1)                                    | 6 (3.0)                                    | 18 (3.1)                  |
| Tramadol                               | 4 (2.1)                               | 6 (3.1)                                    | 1 (0.5)                                    | 11 (1.9)                  |
| Thomapyrin N                           | 3 (1.6)                               | 0 (0.0)                                    | 1 (0.5)                                    | 4 (0.7)                   |
| Panadeine Co                           | 1 (0.5)                               | 2 (1.0)                                    | 0 (0.0)                                    | 3 (0.5)                   |
| Tramadol hydrochloride                 | 2 (1.0)                               | 1 (0.5)                                    | 0 (0.0)                                    | 3 (0.5)                   |
| Hydromorphone                          | 2 (1.0)                               | 0 (0.0)                                    | 0 (0.0)                                    | 2 (0.3)                   |
| Hydromorphone hydrochloride            | 1 (0.5)                               | 0 (0.0)                                    | 1 (0.5)                                    | 2 (0.3)                   |
| Morphine                               | 1 (0.5)                               | 1 (0.5)                                    | 0 (0.0)                                    | 2 (0.3)                   |
| Oxycodone hydrochloride                | 0 (0.0)                               | 0 (0.0)                                    | 2 (1.0)                                    | 2 (0.3)                   |
| Acetylsalicylic acid                   | 0 (0.0)                               | 0 (0.0)                                    | 1 (0.5)                                    | 1 (0.2)                   |
| Acetylsalicylic acid with oxycodone    | 0 (0.0)                               | 1 (0.5)                                    | 0 (0.0)                                    | 1 (0.2)                   |
| Dozol                                  | 0 (0.0)                               | 0 (0.0)                                    | 1 (0.5)                                    | 1 (0.2)                   |
| Fentanyl                               | 1 (0.5)                               | 0 (0.0)                                    | 0 (0.0)                                    | 1 (0.2)                   |
| Gabapentin                             | 1 (0.5)                               | 0 (0.0)                                    | 0 (0.0)                                    | 1 (0.2)                   |
| Morphine sulfate                       | 1 (0.5)                               | 0 (0.0)                                    | 0 (0.0)                                    | 1 (0.2)                   |
| Propacet                               | 0 (0.0)                               | 1 (0.5)                                    | 0 (0.0)                                    | 1 (0.2)                   |
| Safapryn                               | 0 (0.0)                               | 0 (0.0)                                    | 1 (0.5)                                    | 1 (0.2)                   |
|                                        |                                       |                                            |                                            |                           |
| Number of patients with antihistamines | 30 (15.7)                             | 4 (2.0)                                    | 6 (3.0)                                    | 40 (6.8)                  |
| Loratadine                             | 23 (12.0)                             | 4 (2.0)                                    | 5 (2.5)                                    | 32 (5.5)                  |
| Cetirizine hydrochloride               | 6 (3.1)                               | 0 (0.0)                                    | 0 (0.0)                                    | 6 (1.0)                   |
| Diphenhydramine                        | 2 (1.0)                               | 0 (0.0)                                    | 0 (0.0)                                    | 2 (0.3)                   |
| Fexofenadine hydrochloride             | 0 (0.0)                               | 0 (0.0)                                    | 1 (0.5)                                    | 1 (0.2)                   |
|                                        |                                       |                                            |                                            |                           |
| Number of patients with NSAIDs         | 77 (40.3)                             | 28 (14.3)                                  | 58 (29.0)                                  | 163 (27.8)                |
| Ibuprofen                              | 54 (28.3)                             | 21 (10.7)                                  | 37 (18.5)                                  | 112 (19.1)                |
| Naproxen sodium                        | 27 (14.1)                             | 3 (1.5)                                    | 20 (10.0)                                  | 50 (8.5)                  |
| Naproxen                               | 5 (2.6)                               | 8 (4.1)                                    | 5 (2.5)                                    | 18 (3.1)                  |

|            |         |         |         |         |
|------------|---------|---------|---------|---------|
| Celecoxib  | 1 (0.5) | 0 (0.0) | 0 (0.0) | 1 (0.2) |
| Nabumetone | 1 (0.5) | 0 (0.0) | 0 (0.0) | 1 (0.2) |

Note: Analgesics does not include NSAIDs or antihistamines. Loratadine and naproxen listed here are in addition to doses given per protocol. WHODRUG version December 1, 2014 was used in the coding.

*BID* twice a day, *N* number of patients in the analysis set, *QD* once a day

<sup>a</sup> The full analysis set includes all patients who received primary prophylaxis with pegfilgrastim

**Supplemental Table 19** Patient-reported bone pain in cycle 1 by survey day and range (full analysis set<sup>a</sup>)

| Patient-reported bone pain               | No prophylaxis<br>(N = 191) | Naproxen<br>500 mg BID<br>(N = 196) | Loratadine<br>10 mg QD<br>(N = 200) | Total<br>(N = 587) |
|------------------------------------------|-----------------------------|-------------------------------------|-------------------------------------|--------------------|
| Survey day 1 score, n (%) <sup>b,c</sup> |                             |                                     |                                     |                    |
| 0                                        | 129 (67.5)                  | 133 (67.9)                          | 151 (75.5)                          | 413 (70.4)         |
| 1–3                                      | 30 (15.7)                   | 27 (13.8)                           | 28 (14.0)                           | 85 (14.5)          |
| 4–6                                      | 17 (8.9)                    | 12 (6.1)                            | 10 (5.0)                            | 39 (6.6)           |
| 7–10                                     | 5 (2.6)                     | 12 (6.1)                            | 6 (3.0)                             | 23 (3.9)           |
| Missing                                  | 10 (5.2)                    | 12 (6.1)                            | 5 (2.5)                             | 27 (4.6)           |
| Survey day 2 score, n (%) <sup>b,c</sup> |                             |                                     |                                     |                    |
| 0                                        | 79 (41.4)                   | 102 (52.0)                          | 100 (50.0)                          | 281 (47.9)         |
| 1–3                                      | 42 (22.0)                   | 37 (18.9)                           | 61 (30.5)                           | 140 (23.9)         |
| 4–6                                      | 40 (20.9)                   | 27 (13.8)                           | 22 (11.0)                           | 89 (15.2)          |
| 7–10                                     | 17 (8.9)                    | 17 (8.7)                            | 11 (5.5)                            | 45 (7.7)           |
| Missing                                  | 13 (6.8)                    | 13 (6.6)                            | 6 (3.0)                             | 32 (5.5)           |
| Survey day 3 score, n (%) <sup>b,c</sup> |                             |                                     |                                     |                    |
| 0                                        | 65 (34.0)                   | 85 (43.4)                           | 82 (41.0)                           | 232 (39.5)         |
| 1–3                                      | 51 (26.7)                   | 38 (19.4)                           | 56 (28.0)                           | 145 (24.7)         |
| 4–6                                      | 35 (18.3)                   | 42 (21.4)                           | 34 (17.0)                           | 111 (18.9)         |
| 7–10                                     | 28 (14.7)                   | 19 (9.7)                            | 22 (11.0)                           | 69 (11.8)          |
| Missing                                  | 12 (6.3)                    | 12 (6.1)                            | 6 (3.0)                             | 30 (5.1)           |
| Survey day 4 score, n (%) <sup>b,c</sup> |                             |                                     |                                     |                    |
| 0                                        | 78 (40.8)                   | 83 (42.3)                           | 96 (48.0)                           | 257 (43.8)         |
| 1–3                                      | 34 (17.8)                   | 49 (25.0)                           | 51 (25.5)                           | 134 (22.8)         |
| 4–6                                      | 48 (25.1)                   | 38 (19.4)                           | 31 (15.5)                           | 117 (19.9)         |
| 7–10                                     | 18 (9.4)                    | 12 (6.1)                            | 16 (8.0)                            | 46 (7.8)           |
| Missing                                  | 13 (6.8)                    | 14 (7.1)                            | 6 (3.0)                             | 33 (5.6)           |
| Survey day 5 score, n (%) <sup>b,c</sup> |                             |                                     |                                     |                    |
| 0                                        | 90 (47.1)                   | 100 (51.0)                          | 102 (51.0)                          | 292 (49.7)         |
| 1–3                                      | 33 (17.3)                   | 46 (23.5)                           | 50 (25.0)                           | 129 (22.0)         |
| 4–6                                      | 37 (19.4)                   | 25 (12.8)                           | 19 (9.5)                            | 81 (13.8)          |
| 7–10                                     | 18 (9.4)                    | 10 (5.1)                            | 20 (10.0)                           | 48 (8.2)           |
| Missing                                  | 13 (6.8)                    | 15 (7.7)                            | 9 (4.5)                             | 37 (6.3)           |

*BID* twice a day, *N* number of patients in the analysis set, *QD* once a day

<sup>a</sup> The full analysis set includes all patients who received primary prophylaxis with pegfilgrastim

<sup>b</sup> n = number of patients who entered cycle 1

<sup>c</sup> Percentage is based on the number of patients who entered cycle 1

**Supplemental Table 20** Treatment emergent AEs in ≥5% of patients in any treatment arm by system organ class and preferred term (safety analysis set<sup>a</sup>)

| System Organ Class Preferred Term                              | No Prophylaxis (N = 196) n (%) | Naproxen 500 mg BID (N = 193) n (%) | Loratadine 10 mg QD (N = 198) n (%) |
|----------------------------------------------------------------|--------------------------------|-------------------------------------|-------------------------------------|
| Number of patients reporting treatment emergent adverse events | 188 (95.9)                     | 192 (99.5)                          | 194 (98.0)                          |
| <b>Gastrointestinal disorders</b>                              | 159 (81.1)                     | 171 (88.6)                          | 157 (79.3)                          |
| Nausea                                                         | 99 (50.5)                      | 119 (61.7)                          | 100 (50.5)                          |
| Constipation                                                   | 60 (30.6)                      | 78 (40.4)                           | 66 (33.3)                           |
| Diarrhoea                                                      | 68 (34.7)                      | 75 (38.9)                           | 71 (35.9)                           |
| Vomiting                                                       | 34 (17.3)                      | 45 (23.3)                           | 29 (14.6)                           |
| Stomatitis                                                     | 30 (15.3)                      | 32 (16.6)                           | 38 (19.2)                           |
| Dyspepsia                                                      | 26 (13.3)                      | 29 (15.0)                           | 25 (12.6)                           |
| Gastrooesophageal reflux disease                               | 16 (8.2)                       | 16 (8.3)                            | 12 (6.1)                            |
| Abdominal pain                                                 | 14 (7.1)                       | 11 (5.7)                            | 5 (2.5)                             |
| <b>General disorders and administration site conditions</b>    | 148 (75.5)                     | 148 (76.7)                          | 157 (79.3)                          |
| Fatigue                                                        | 120 (61.2)                     | 110 (57.0)                          | 128 (64.6)                          |
| Mucosal inflammation                                           | 18 (9.2)                       | 21 (10.9)                           | 23 (11.6)                           |
| Pyrexia                                                        | 17 (8.7)                       | 21 (10.9)                           | 17 (8.6)                            |
| Oedema peripheral                                              | 18 (9.2)                       | 17 (8.8)                            | 19 (9.6)                            |
| Pain                                                           | 25 (12.8)                      | 17 (8.8)                            | 22 (11.1)                           |
| Asthenia                                                       | 10 (5.1)                       | 8 (4.1)                             | 9 (4.5)                             |
| <b>Skin and subcutaneous tissue disorders</b>                  | 106 (54.1)                     | 124 (64.2)                          | 134 (67.7)                          |
| Alopecia                                                       | 68 (34.7)                      | 85 (44.0)                           | 106 (53.5)                          |
| Rash                                                           | 23 (11.7)                      | 23 (11.9)                           | 29 (14.6)                           |
| Pruritus                                                       | 13 (6.6)                       | 9 (4.7)                             | 9 (4.5)                             |
| Dry skin                                                       | 5 (2.6)                        | 8 (4.1)                             | 10 (5.1)                            |
| <b>Musculoskeletal and connective tissue disorders</b>         | 121 (61.7)                     | 114 (59.1)                          | 117 (59.1)                          |
| Bone pain                                                      | 57 (29.1)                      | 55 (28.5)                           | 63 (31.8)                           |
| Arthralgia                                                     | 28 (14.3)                      | 31 (16.1)                           | 24 (12.1)                           |
| Myalgia                                                        | 23 (11.7)                      | 18 (9.3)                            | 22 (11.1)                           |
| Pain in extremity                                              | 19 (9.7)                       | 17 (8.8)                            | 22 (11.1)                           |
| Back pain                                                      | 32 (16.3)                      | 16 (8.3)                            | 17 (8.6)                            |



|                                                        |            |            |            |
|--------------------------------------------------------|------------|------------|------------|
|                                                        |            |            |            |
| <b>Nervous system disorders</b>                        | 103 (52.6) | 108 (56.0) | 112 (56.6) |
| Headache                                               | 49 (25.0)  | 54 (28.0)  | 48 (24.2)  |
| Neuropathy peripheral                                  | 14 (7.1)   | 24 (12.4)  | 24 (12.1)  |
| Dysgeusia                                              | 14 (7.1)   | 20 (10.4)  | 32 (16.2)  |
| Dizziness                                              | 26 (13.3)  | 15 (7.8)   | 15 (7.6)   |
| Peripheral sensory neuropathy                          | 8 (4.1)    | 11 (5.7)   | 6 (3.0)    |
|                                                        |            |            |            |
| <b>Blood and lymphatic system disorders</b>            | 70 (35.7)  | 87 (45.1)  | 68 (34.3)  |
| Anaemia                                                | 43 (21.9)  | 61 (31.6)  | 41 (20.7)  |
| Neutropenia                                            | 21 (10.7)  | 27 (14.0)  | 27 (13.6)  |
| Thrombocytopenia                                       | 7 (3.6)    | 15 (7.8)   | 9 (4.5)    |
| Febrile neutropenia                                    | 11 (5.6)   | 14 (7.3)   | 4 (2.0)    |
| Leukopenia                                             | 10 (5.1)   | 10 (5.2)   | 7 (3.5)    |
| Lymphopenia                                            | 2 (1.0)    | 10 (5.2)   | 2 (1.0)    |
|                                                        |            |            |            |
| <b>Infections and infestations</b>                     | 73 (37.2)  | 77 (39.9)  | 57 (28.8)  |
| Urinary tract infection                                | 9 (4.6)    | 13 (6.7)   | 3 (1.5)    |
| Upper respiratory tract infection                      | 12 (6.1)   | 8 (4.1)    | 6 (3.0)    |
|                                                        |            |            |            |
| <b>Respiratory, thoracic and mediastinal disorders</b> | 72 (36.7)  | 71 (36.8)  | 76 (38.4)  |
| Cough                                                  | 22 (11.2)  | 25 (13.0)  | 23 (11.6)  |
| Dyspnoea                                               | 22 (11.2)  | 18 (9.3)   | 16 (8.1)   |
| Oropharyngeal pain                                     | 15 (7.7)   | 13 (6.7)   | 14 (7.1)   |
| Epistaxis                                              | 9 (4.6)    | 9 (4.7)    | 17 (8.6)   |
| Nasal congestion                                       | 2 (1.0)    | 6 (3.1)    | 13 (6.6)   |
|                                                        |            |            |            |
| <b>Metabolism and nutrition disorders</b>              | 68 (34.7)  | 68 (35.2)  | 66 (33.3)  |
| Decreased appetite                                     | 36 (18.4)  | 34 (17.6)  | 39 (19.7)  |
| Dehydration                                            | 24 (12.2)  | 17 (8.8)   | 14 (7.1)   |
| Hypokalaemia                                           | 12 (6.1)   | 17 (8.8)   | 13 (6.6)   |
| Hyperglycaemia                                         | 9 (4.6)    | 10 (5.2)   | 7 (3.5)    |
|                                                        |            |            |            |
| <b>Psychiatric disorders</b>                           | 44 (22.4)  | 52 (26.9)  | 49 (24.7)  |
| Insomnia                                               | 22 (11.2)  | 35 (18.1)  | 31 (15.7)  |
| Anxiety                                                | 16 (8.2)   | 20 (10.4)  | 11 (5.6)   |
| Depression                                             | 11 (5.6)   | 6 (3.1)    | 7 (3.5)    |
|                                                        |            |            |            |
| <b>Investigations</b>                                  | 35 (17.9)  | 37 (19.2)  | 38 (19.2)  |
| White blood cell count decreased                       | 13 (6.6)   | 7 (3.6)    | 10 (5.1)   |
| Neutrophil count decreased                             | 7 (3.6)    | 4 (2.1)    | 10 (5.1)   |

|                           |           |           |           |
|---------------------------|-----------|-----------|-----------|
|                           |           |           |           |
| <b>Vascular disorders</b> | 37 (18.9) | 28 (14.5) | 30 (15.2) |
| Hot flush                 | 16 (8.2)  | 12 (6.2)  | 16 (8.1)  |

*AE* adverse event, *BID* twice a day, *QD* once a day

<sup>a</sup> The safety analysis set includes all patients who received primary prophylaxis with pegfilgrastim; allocation to treatment groups is based on prophylactic medication actually received

Supplemental Fig. 1 Naproxen bone pain survey

## Participant Survey: Naproxen



Survey # \_\_\_\_\_ Date: \_\_\_\_\_

**Survey Day 1:**

- Take two doses of naproxen (500 mg) and record these doses on the medication log
- Complete the survey right before you go to bed

Participant Initials and Date: \_\_\_\_\_

**Survey Day 2:**

- Take two doses of naproxen (500 mg) and record these doses on the medication log
- Complete the survey right before you go to bed

Participant Initials and Date: \_\_\_\_\_

**Survey Day 3:**

- Take two doses of naproxen (500 mg) and record these doses on the medication log
- Complete the survey right before you go to bed

Participant Initials and Date: \_\_\_\_\_

**Survey Day 4:**

- Take two doses of naproxen (500 mg) and record these doses on the medication log
- Complete the survey right before you go to bed

Participant Initials and Date: \_\_\_\_\_

**Survey Day 5:**

- Take two doses of naproxen (500 mg) and record these doses on the medication log
- Complete the survey right before you go to bed

Participant Initials and Date: \_\_\_\_\_

### INSTRUCTIONS FOR SURVEY

This form will be used to write down any bone pain you may have. You should complete this form each day for 5 days, beginning on the day you get your Neulasta shot. Fill out the survey at the same time every day. The easiest way to remember to do this may be to fill out the survey right before you go to bed each day.

After you have filled out the forms each day for 5 days, put the survey in a sealed envelope, and give it back to your study doctor or study staff at your next chemotherapy visit.



Complete survey 5 days beginning day of Neulasta administration

### SURVEY DAY 1

#### NEULASTA ADMINISTRATION

Please circle the number below to show how bad your bone pain was today at its worst. If you have had no bone pain, please circle 0.



Where did your bones hurt? Please circle the word on the figure to the right that best describes where the bone pain was. If you have bone pain in more than one place, please circle all locations that you had bone pain.



Did you take any medicine to help ease the bone pain?  
 Yes  No  
 If yes, please add to the Medication Log.

### SURVEY DAY 2

Please circle the number below to show how bad your bone pain was today at its worst. If you have had no bone pain, please circle 0.



Where did your bones hurt? Please circle the word on the figure to the right that best describes where the bone pain was. If you have bone pain in more than one place, please circle all locations that you had bone pain.



Did you take any medicine to help ease the bone pain?  
 Yes  No  
 If yes, please add to the Medication Log.

### SURVEY DAY 3

Please circle the number below to show how bad your bone pain was today at its worst. If you have had no bone pain, please circle 0.



Where did your bones hurt? Please circle the word on the figure to the right that best describes where the bone pain was. If you have bone pain in more than one place, please circle all locations that you had bone pain.



Did you take any medicine to help ease the bone pain?  
 Yes  No  
 If yes, please add to the Medication Log.

### SURVEY DAY 4

Please circle the number below to show how bad your bone pain was today at its worst. If you have had no bone pain, please circle 0.



Where did your bones hurt? Please circle the word on the figure to the right that best describes where the bone pain was. If you have bone pain in more than one place, please circle all locations that you had bone pain.



Did you take any medicine to help ease the bone pain?  
 Yes  No  
 If yes, please add to the Medication Log.

### SURVEY DAY 5

Please circle the number below to show how bad your bone pain was today at its worst. If you have had no bone pain, please circle 0.



Where did your bones hurt? Please circle the word on the figure to the right that best describes where the bone pain was. If you have bone pain in more than one place, please circle all locations that you had bone pain.



Did you take any medicine to help ease the bone pain?  
 Yes  No  
 If yes, please add to the Medication Log.



## Supplemental Fig. 2 CONSORT Diagram

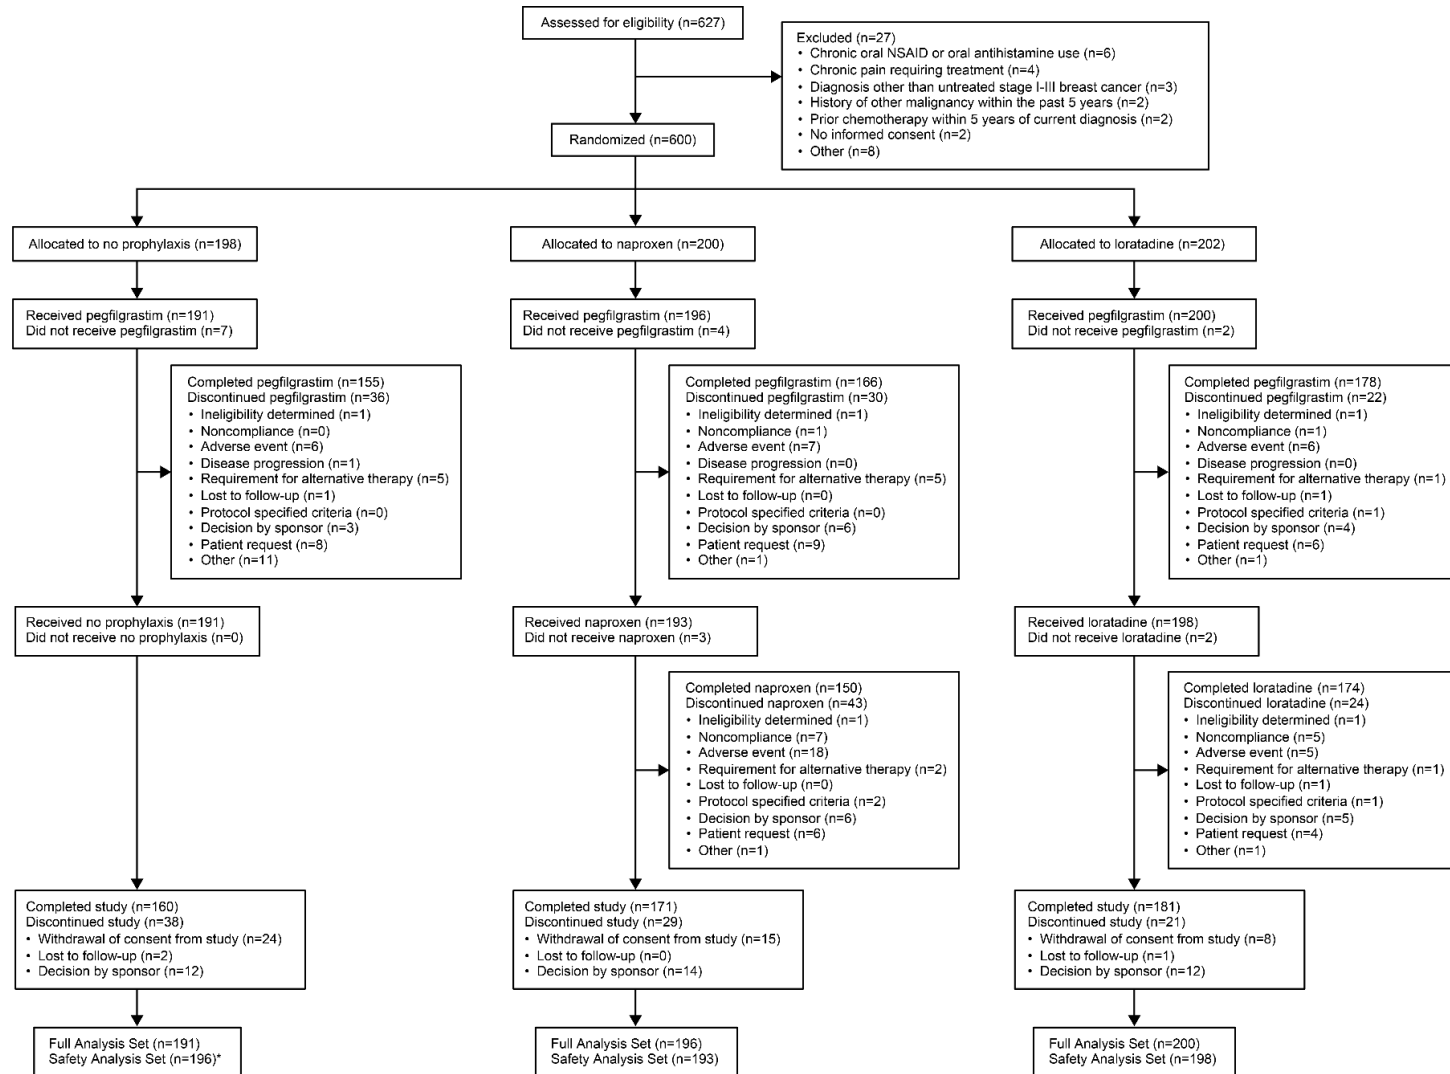

\*2 patients in the naproxen group and 3 patients in the loratadine group never received prophylaxis; these 5 patients are included in the safety analysis set for the no prophylaxis group.

**Supplemental Fig. 3** Percentage of patients with additional bone pain medications from medication logs (full analysis set)

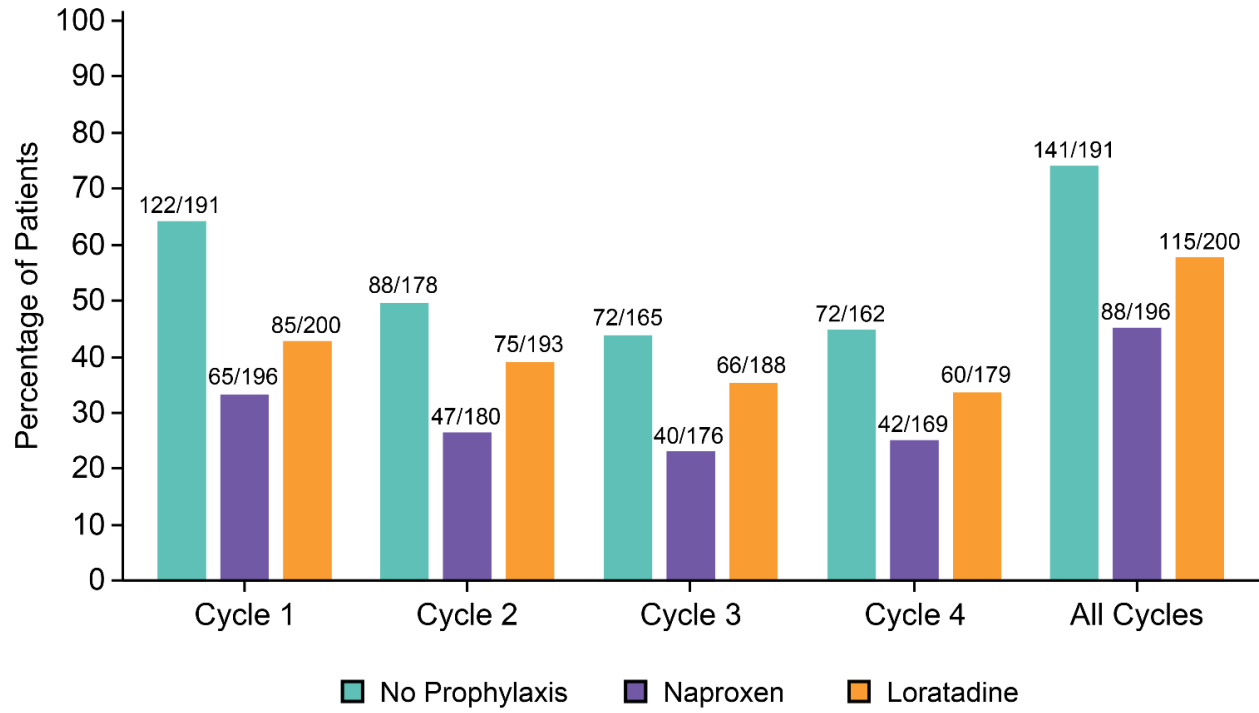

**Supplemental Fig. 4** Distribution of patient-reported bone pain in cycle 1 by cycle day (full analysis set). *L* loratadine, *N* naproxen, *NP* no prophylaxis

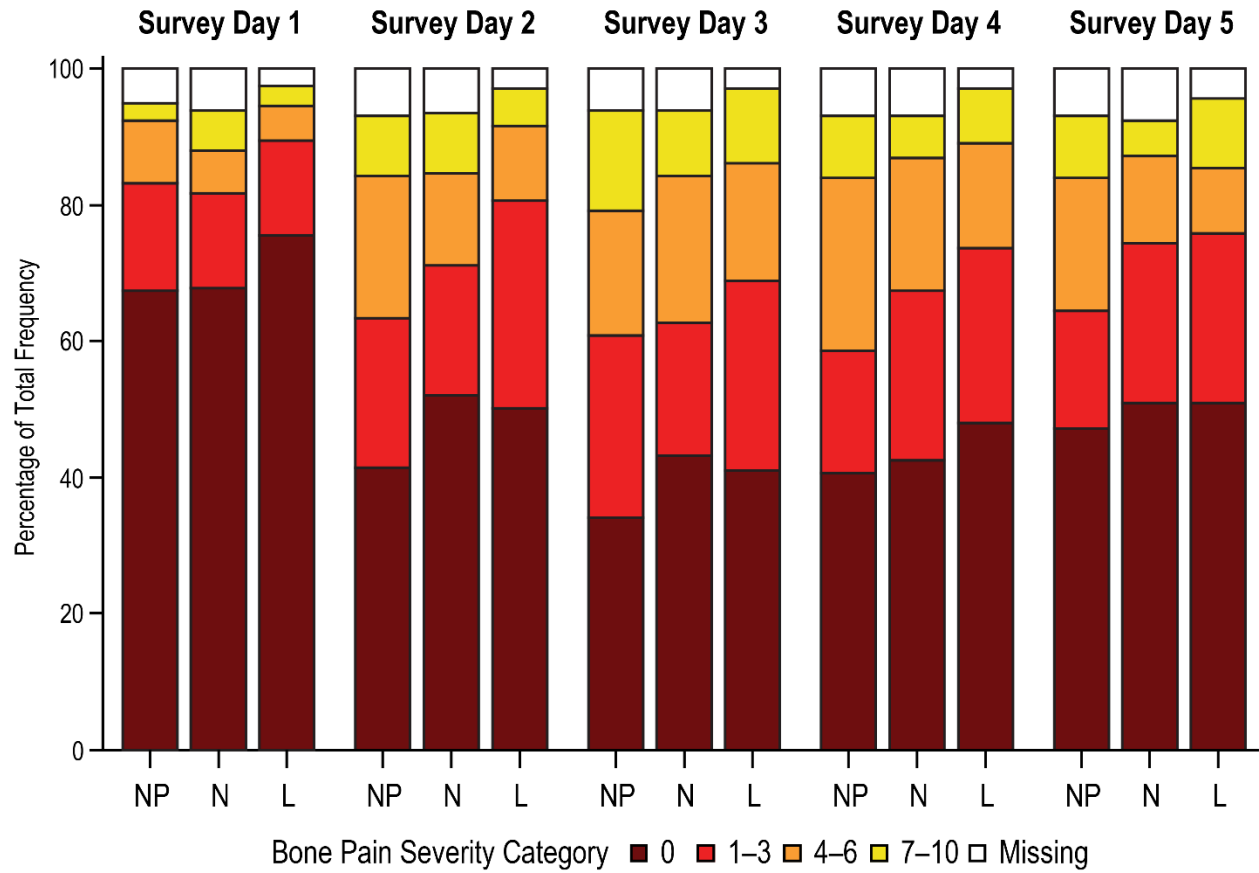

Supplement: 520_2017_3959_MOESM1_ESM.pdf [file 520_2017_3959_MOESM1_ESM.pdf]
